# Supplementary material for: Electronic effects on polypyridyl Co complex-based water reduction catalysts
Source: Royal Society of Chemistry journal article supplement (doi:10.1039/d1ra02435c), 2021-01-01
Supplement: d1ra02435c1.pdf [file d1ra02435c1.pdf]

## **Electronic effects on polypyridyl Co complex-based water reduction catalysts.**

Xusheng Guo,<sup>a,b</sup> Chao Li,<sup>a</sup> Weibo Wang,<sup>a</sup> Baowen Zhang,<sup>a</sup> Yuanjun Hou,<sup>\*a</sup> Xuesong Wang,<sup>\*a,b</sup> and Qianxiong Zhou<sup>\*a</sup>

a. Key Laboratory of Photochemical Conversion and Optoelectronic Materials, Technical Institute of Physics and Chemistry Chinese Academy of Science Beijing 100190, P. R. China. E-mail: [houyuanjun@mail.ipc.ac.cn](mailto:houyuanjun@mail.ipc.ac.cn), [xswang@mail.ipc.ac.cn](mailto:xswang@mail.ipc.ac.cn), [zhouqianxiong@mail.ipc.ac.cn](mailto:zhouqianxiong@mail.ipc.ac.cn).

b. University of Chinese Academy of Science, Beijing 100049, P. R. China.

### **Table of Contents**

#### **1. Synthesis**

#### **2. <sup>1</sup>H NMR spectra**

#### **3. ESI-MS spectra**

#### **4. IR spectra**

#### **5. UV-vis spectra**

#### **6. Cyclic voltammetry results**

#### **7. Photocatalytic hydrogen evolution experiments**

#### **8. DFT computations**

## 1. Synthesis

### **L2, 6-MeOTPA, ((6-methoxyl-2-pyridyl)methyl)bis(2-pyridylmethyl)amine**

Similar to the method in literature,<sup>1-3</sup> the ligand **L2** was synthesized in an argon saturated flask. 6-Methoxypyridine-2-carbaldehyde (549 mg, 4 mmol), *N,N*-bis(2-pyridinylmethyl)amine (797 mg, 4 mmol) and sodium triacetoxyborohydride (1.3 g, 5.86 mmol) were dissolved in 1,2-dichloroethane and stirred for 2 days at room temperature. Afterwards, the solvent was removed and the crude product was dissolved in dichloromethane, then the solution was washed by saturated NaCO<sub>3</sub> aqueous solution for three times. After drying by anhydrous MgSO<sub>4</sub>, the crude product was purified by column chromatography, and pure product was obtained as yellow oil (1.1 g, 85.9%). <sup>1</sup>H NMR (400 MHz, Chloroform-*d*) δ 8.53 (dd, *J* = 4.8, 1.4 Hz, 2H), 7.66 (d, *J* = 4.3 Hz, 4H), 7.53 (t, *J* = 7.8 Hz, 1H), 7.15 (q, *J* = 4.5 Hz, 2H), 7.06 (d, *J* = 7.2 Hz, 1H), 6.60 (d, *J* = 8.2 Hz, 1H), 4.02 (s, 3H), 3.94 (d, *J* = 1.1 Hz, 4H), 3.87 (s, 2H). <sup>13</sup>C NMR (101 MHz, Chloroform-*d*) δ ppm = 163.61, 159.81, 156.86, 149.03, 138.75, 136.37, 122.73, 121.89, 115.43, 108.71, 60.23, 60.00, 53.26. ESI-MS: *m/z* = 321.1699 (calcd *m/z* = 321.17 for [M+H<sup>+</sup>])

### **L3, 5-MeOTPA, ((5-methoxyl-2-pyridyl)methyl)bis(2-pyridylmethyl)amine**

Following the above mentioned procedures and using 5-methoxypyridine-2-carbaldehyde (250 mg, 1.8 mmol) instead of 6-methoxypyridine-2-carbaldehyde, we got **L3** as yellow oily product (289.8 mg, 49.6%). <sup>1</sup>H NMR (400 MHz, Chloroform-*d*) δ 8.55 (d, *J* = 4.9 Hz, 2H), 8.25 (d, *J* = 2.9 Hz, 1H), 7.67 (t, *J* = 7.7 Hz, 2H), 7.59 (d, *J* = 7.8 Hz, 2H), 7.49 (d, *J* = 8.5 Hz, 1H), 7.22 – 7.12 (m, 3H), 3.93 (d, *J* = 26.3 Hz, 5H), 3.84 (s, 3H). <sup>13</sup>C NMR (101 MHz, Chloroform-*d*) δ ppm = 159.52, 154.58, 151.21, 149.05, 136.34, 136.29, 123.44, 122.97, 121.91, 121.27, 60.03, 59.43, 55.60. ESI-MS: *m/z* = 321.1703 (calcd *m/z* = 321.17 for [M+H<sup>+</sup>])

### **L4, 4-MeOTPA, ((4-methoxyl-2-pyridyl)methyl)bis(2-pyridylmethyl)amine**

Following the above mentioned procedures and using 4-methoxypyridine-2-carbaldehyde (440 mg, 3 mmol) instead of 6-methoxypyridine-2-carbaldehyde, we obtained **L4** as yellow oily product (706.6 mg, 73.5%). <sup>1</sup>H NMR (400 MHz, DMSO-*d*<sub>6</sub>) δ 8.50 (d, *J* = 4.8 Hz, 2H), 8.30 (d, *J* = 5.7 Hz, 1H), 7.77 (d, *J* = 7.6 Hz, 2H), 7.58 (d, *J* = 7.8 Hz, 2H), 7.23-7.27 (m, 2H), 7.18 (s, 1H), 6.84 (d, *J* = 3.7 Hz, 1H), 3.82 (s, 3H), 3.80 (s, 4H), 3.74 (s, 2H). <sup>13</sup>C NMR (101 MHz, Chloroform-*d*) δ ppm = 166.25, 161.26, 159.35, 150.27, 149.11, 136.37, 122.93, 121.97, 108.67, 108.29, 60.21, 60.18, 55.07. ESI-MS: *m/z* = 321.1700 (calcd *m/z* = 321.17 for [M+H<sup>+</sup>])

### **L5, 4-MeTPA, ((4-methyl-2-pyridyl)methyl)bis(2-pyridylmethyl)amine**

Following the above mentioned procedures and using 4-methylpyridine-2-carbaldehyde (363 mg, 3 mmol) instead of 6-methoxypyridine-2-carbaldehyde, **L5** was achieved as yellow oily product (590.7 mg, 64.7%). <sup>1</sup>H NMR (400 MHz, Chloroform-*d*) δ 8.57–8.48 (m, 2H), 8.38 (d, *J* = 5.1 Hz, 1H), 7.65 (tt, *J* = 7.6, 1.5 Hz, 2H), 7.57 (d, *J* = 7.8 Hz, 2H), 7.35 (s, 1H), 7.14 (dd, *J* = 7.3, 5.1 Hz, 2H), 6.96 (d, *J* = 5.1 Hz, 1H), 3.87 (d, *J* = 14.7 Hz, 6H), 2.34 (s, 3H). <sup>13</sup>C NMR (101 MHz,

Chloroform-d)  $\delta$  ppm =159.39, 158.99, 149.05, 148.81, 147.44, 136.37, 123.84, 123.05, 122.99, 121.94, 60.23, 60.15, 21.14. ESI-MS:  $m/z$  = 305.1752 (calcd  $m/z$  = 321.17 for  $[M+H^+]$ )

### **C2, [Co<sup>II</sup>(6-MeOTPA)Cl]Cl**

**L2** (320 mg, 1 mmol) and  $\text{CoCl}_2 \cdot 6\text{H}_2\text{O}$  (238 mg, 1 mmol) were dissolved in dry acetonitrile and mixed under an argon atmosphere, then stirred for 4 h at room temperature. After removal of the solvent, the solid was washed by diethyl ether and hexane. After drying under vacuum overnight, the final product was obtained as green powders (290.8 mg, 64.6%). IR (KBr,  $\text{cm}^{-1}$ ): 3414, 1604, 1469, 1436, 1307, 1268, 1153, 1032, 788, 754, 639. UV/Vis ( $\text{CH}_3\text{CN}$ )  $\lambda$ = 499, 627(nm). ESI-MS:  $m/z$  = 414.06543 (calcd  $m/z$  =414.07 for  $[\text{Co}(6\text{-MeOTPA})\text{Cl}]^+$ ), 424.09390 (calcd  $m/z$  = 424.09 for  $[\text{Co}(6\text{-MeOTPA})\text{COOH}]$ ). Elemental analysis: anal. calcd for  $\text{C}_{19}\text{H}_{20}\text{Cl}_2\text{CoN}_4\text{O}$ : C, 50.69; H ,4.48; N, 12.44. Found: C, 50.74; H, 4.55; N, 12.39.

### **C3, [Co<sup>II</sup>(5-MeOTPA)Cl]Cl**

Similar to **C2**, **C3** was obtained (182.6 mg, 81.2%). IR (KBr,  $\text{cm}^{-1}$ ): 3429, 1609, 1573, 1492, 1438, 1293, 1265, 1026, 839, 774, 651. UV/Vis ( $\text{CH}_3\text{CN}$ )  $\lambda$ = 487, 633(nm). ESI-MS:  $m/z$  = 414.06534 (calcd  $m/z$  = 414.07 for  $[\text{Co}(5\text{-MeOTPA})\text{Cl}]^+$ ). Elemental analysis: anal. calcd for  $\text{C}_{19}\text{H}_{20}\text{Cl}_2\text{CoN}_4\text{O}$ : C, 50.69; H ,4.48; N, 12.44. Found: C, 50.61; H, 4.39; N, 12.42.

### **C4, [Co<sup>II</sup>(4-MeOTPA)Cl]Cl**

Similar to **C2**, **C4** was obtained (350.9 mg, 77.9%). IR (KBr,  $\text{cm}^{-1}$ ): 3424, 1612, 1489, 1437, 1312, 1263, 1038, 847, 775, 649. UV/Vis ( $\text{CH}_3\text{CN}$ )  $\lambda$ = 490, 636(nm). ESI-MS:  $m/z$  = 414.06488 (calcd  $m/z$  = 414.07 for  $[\text{Co}(4\text{-MeOTPA})\text{Cl}]^+$  ). Elemental analysis: anal. calcd for  $\text{C}_{19}\text{H}_{20}\text{Cl}_2\text{CoN}_4\text{O}$ : C, 50.69; H ,4.48; N, 12.44. Found: C, 50.67; H, 4.63; N, 12.56.

### **C5, [Co<sup>II</sup>(4-MeTPA)Cl] Cl**

Similar to **C2**, **C5** was obtained (392.8 mg, 90.5%). IR (KBr,  $\text{cm}^{-1}$ ): 3446, 1607, 1482, 1438, 1310, 1266, 1025, 839, 775, 649. UV/Vis ( $\text{CH}_3\text{CN}$ )  $\lambda$ = 486, 634(nm). ESI-MS:  $m/z$  = 398.07074 (calcd  $m/z$  = 398.07 for  $[\text{Co}(4\text{-MeTPA})\text{Cl}]^+$ ). Elemental analysis: anal. calcd for  $\text{C}_{19}\text{H}_{20}\text{Cl}_2\text{CoN}_4$ : C, 52.55; H ,4.64; N, 12.90. Found: C, 52.73; H, 4.68; N, 12.77.

## 2. $^1\text{H}$ NMR spectra

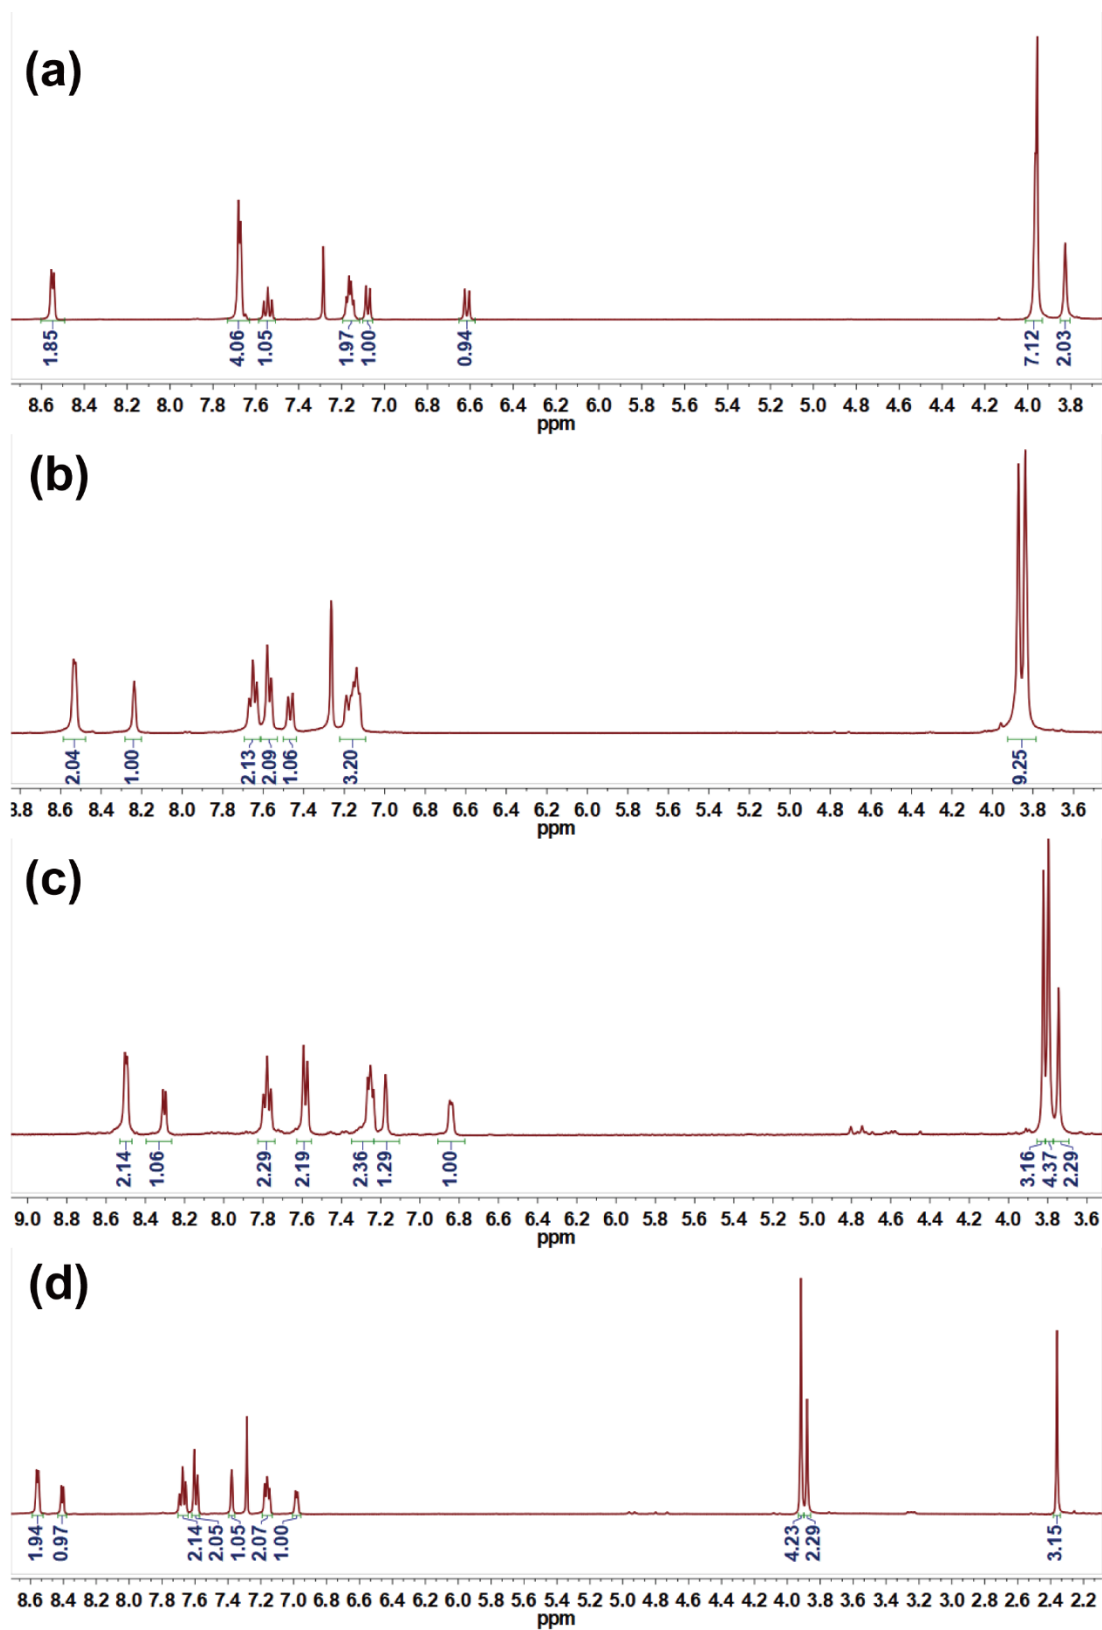

Figure S1.  $^1\text{H}$  NMR spectra of L2 (a), L3 (b), L5 (d) in  $\text{CDCl}_3$  and L4 (c) in  $\text{DMSO}-d_6$ .

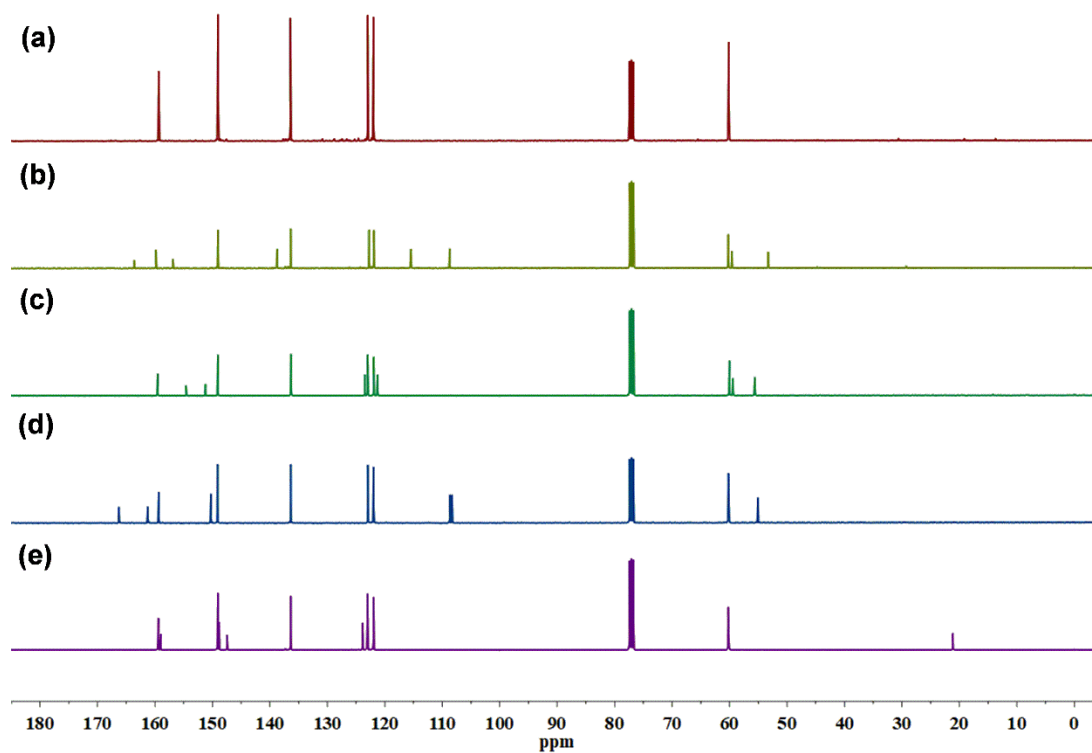

**Figure S2.**  $^{13}\text{C}$  NMR spectra of **L1-L5** (a-e) in  $\text{CDCl}_3$ .

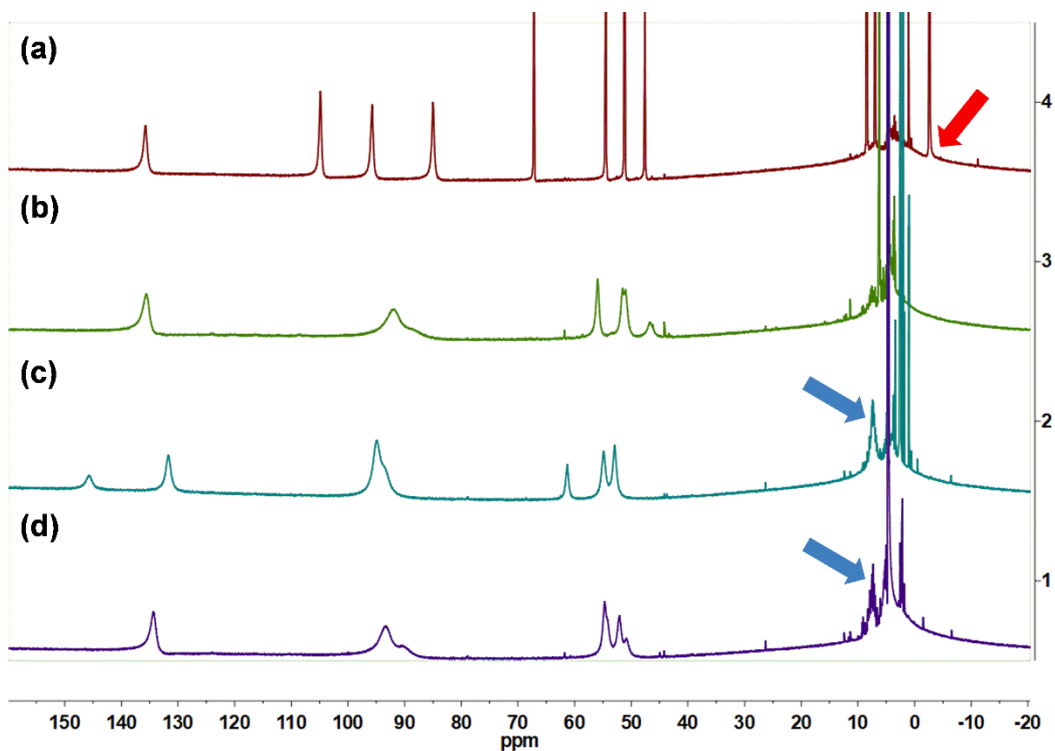

**Figure S3.**  $^1\text{H}$  NMR spectra of **C2-C5** (a-d) in  $\text{D}_2\text{O}$ , the red arrow points to the signal of the methoxy group near the Co center and the blue arrows point to the signals of the methoxy and methyl groups far away from the Co center.

### 3. ESI-MS spectra

Cuoasheng-27 #11 RT: 0.11 AV: 1 NL: 1.15E8  
T: FIMS+p ESI Full ms [50.0000-750.0000]

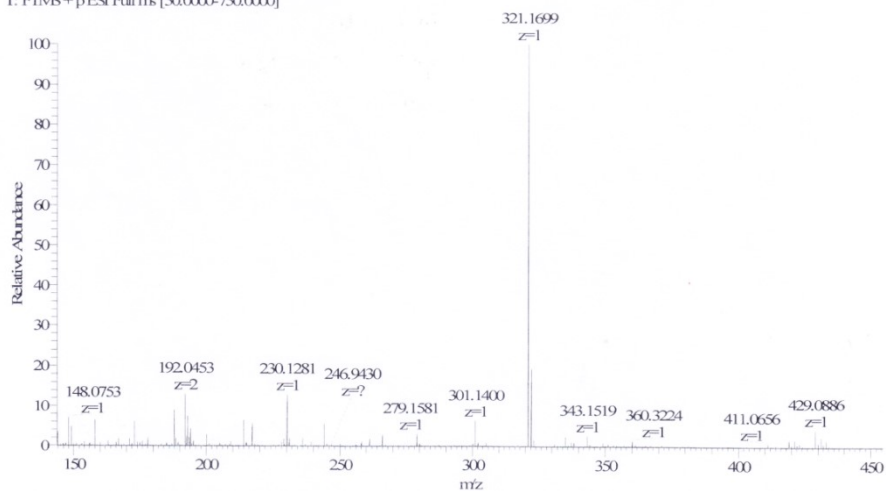

Figure S4. ESI-MS spectrum of L2.

Cuoasheng-56 #299 RT: 1.62 AV: 1 NL: 4.25E8  
T: FIMS+p ESI Full ms [100.0000-1500.0000]

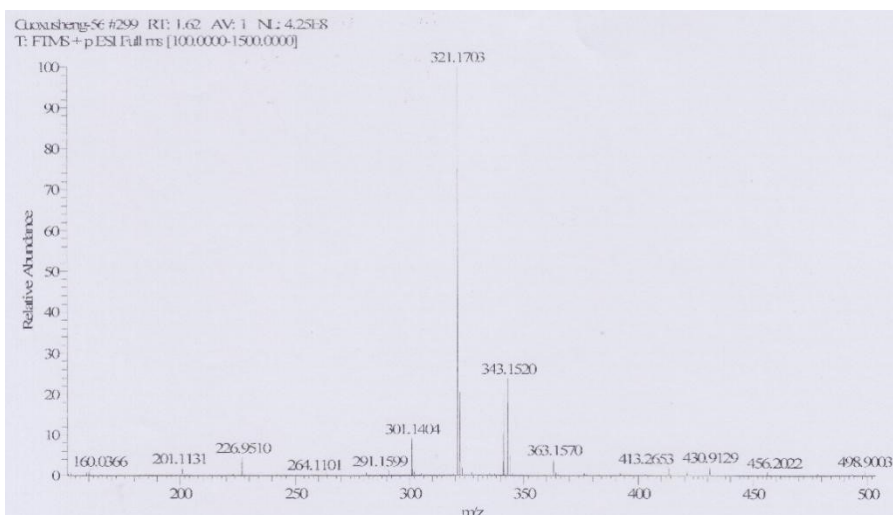

Figure S5. ESI-MS spectrum of L3.

Cuoasheng-66 #17 RT: 0.10 AV: 1 NL: 1.87E9  
T: FIMS+p ESI Full ms [50.0000-750.0000]

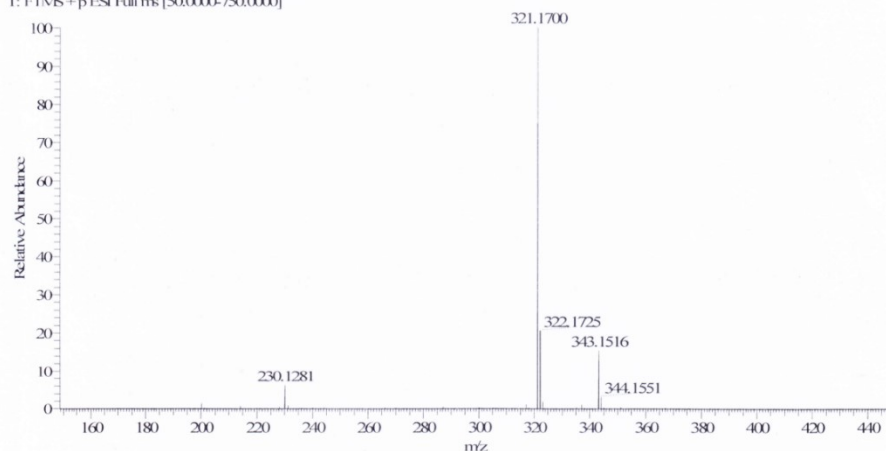

Figure S6. ESI-MS spectrum of L4.

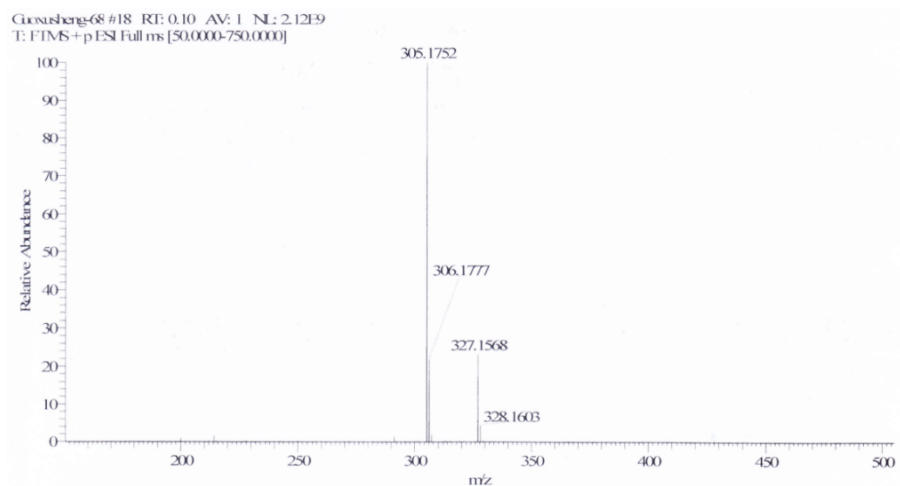

**Figure S7.** ESI-MS spectrum of L5.

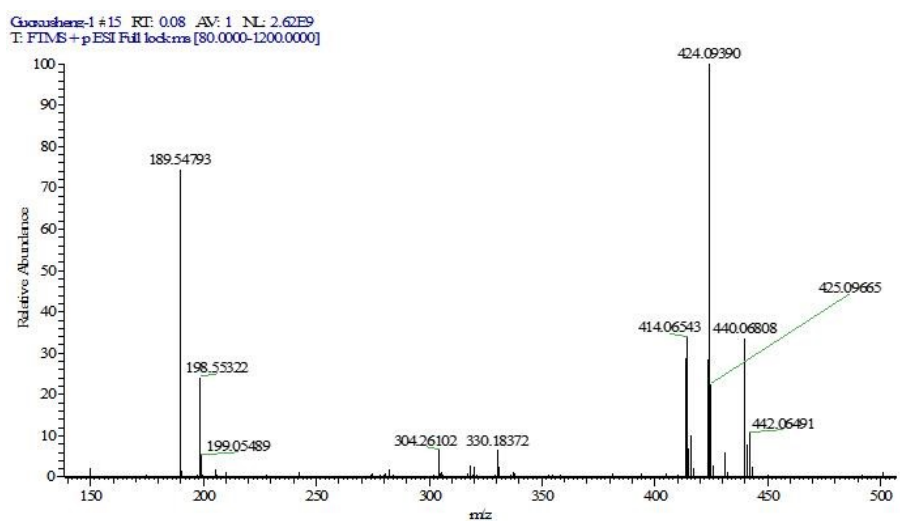

**Figure S8.** ESI-MS spectrum of C2.

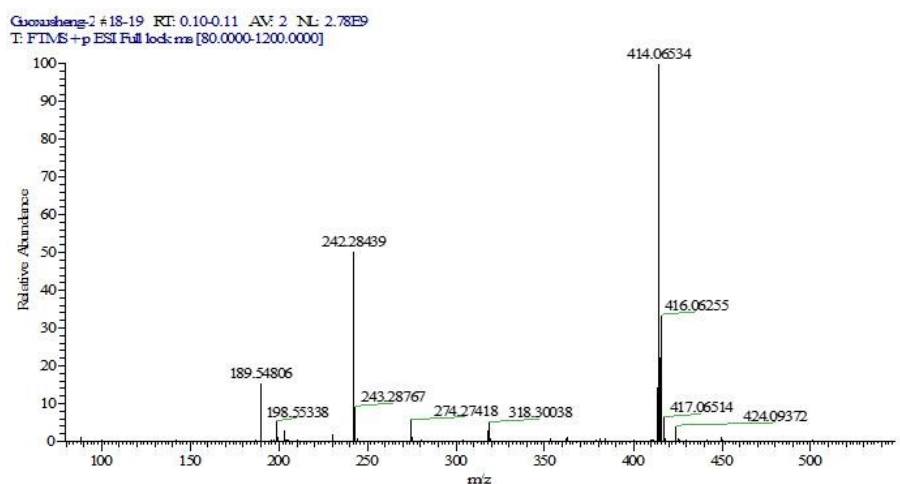

**Figure S9.** ESI-MS spectrum of C3.

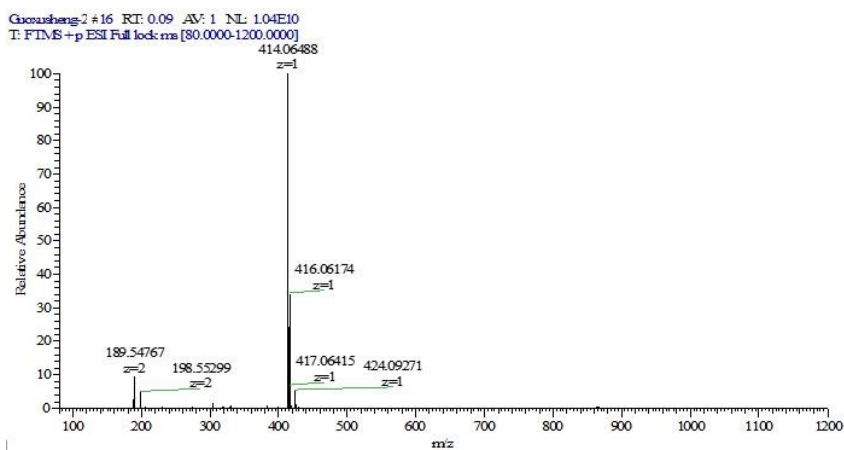

Figure S10. ESI-MS spectrum of C4.

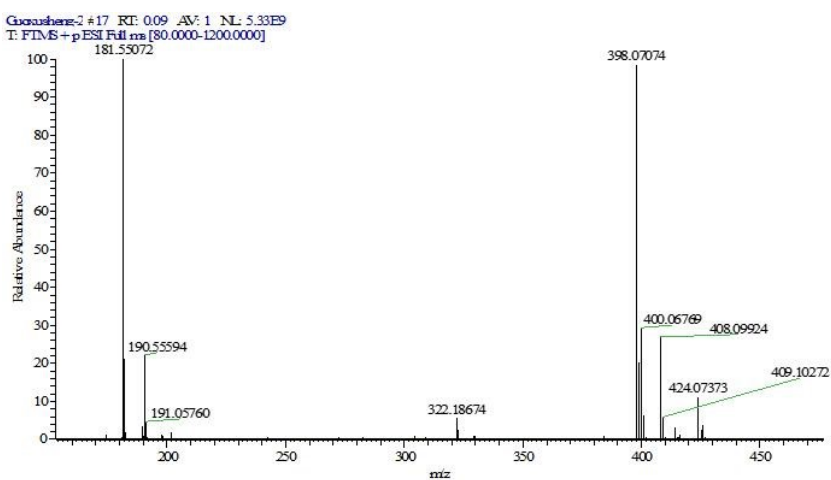

Figure S11. ESI-MS spectrum of C5.

#### 4. IR spectra

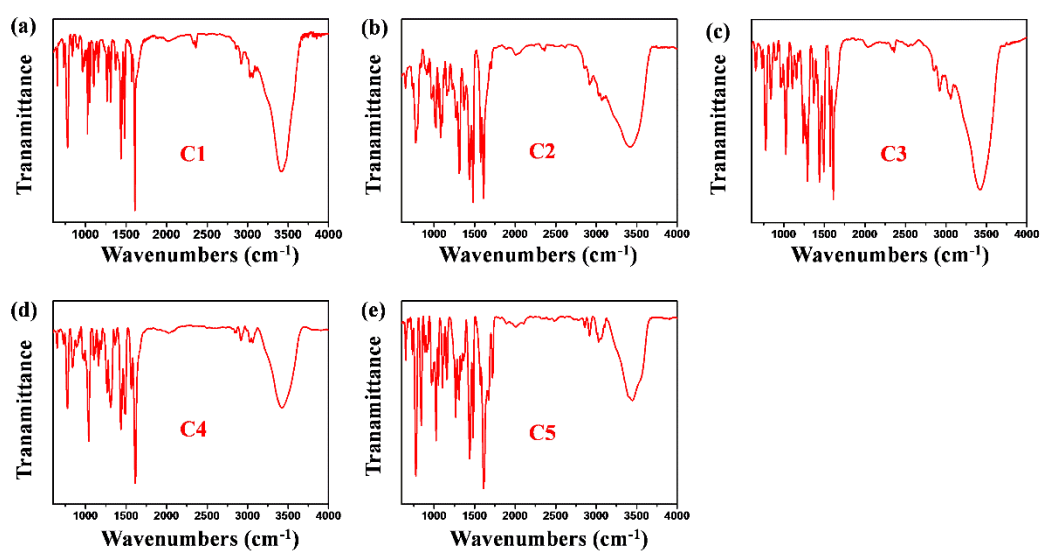

Figure S12. IR spectra of C1-C5 (a-e).



## 5. UV-vis absorption spectra

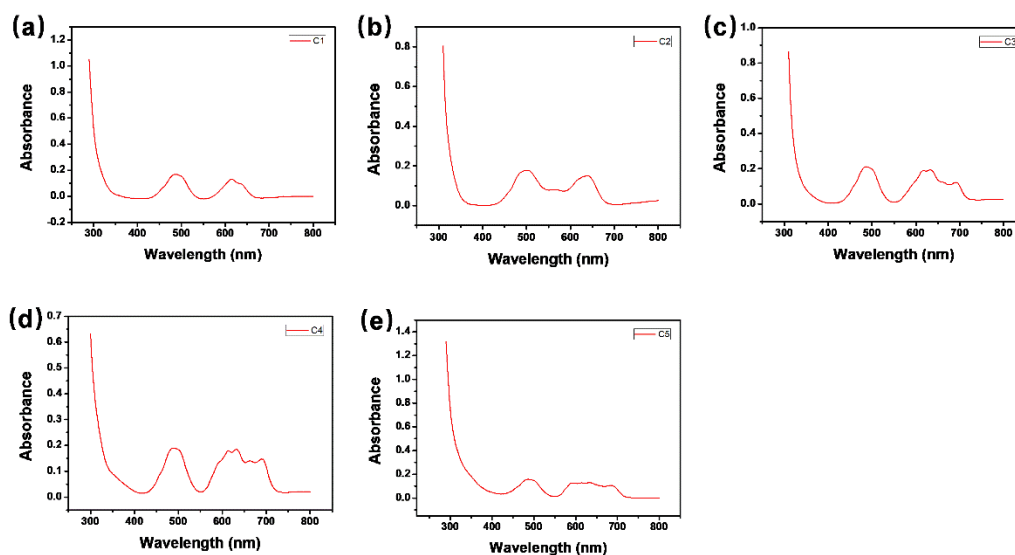

Figure S13. UV-vis absorption spectra of C1-C5 (a-e).

Table S1. Absorption maxima and molar absorptivity ( $\epsilon$ ) of C1-C5 in the region of 400-800 nm

| Complex                                       | C1  | C2  | C3  | C4  | C5  |
|-----------------------------------------------|-----|-----|-----|-----|-----|
| $\lambda_{\max}/\text{nm}$                    | 489 | 499 | 487 | 490 | 486 |
| $\epsilon/\text{mol}^{-1}\cdot\text{cm}^{-1}$ | 168 | 179 | 214 | 192 | 159 |

## 6. Cyclic voltammetry

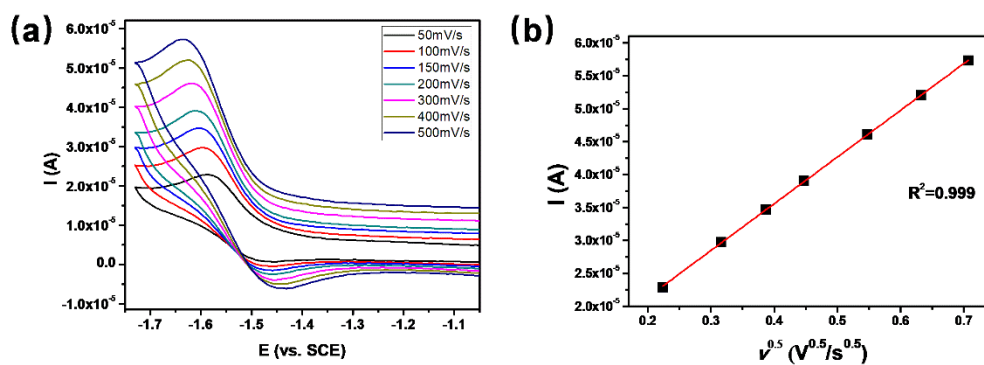

Figure S14. (a) CVs of 1.0 mM C1 under various scan rates in anhydrous  $\text{CH}_3\text{CN}$  with 0.1 M  $\text{TBAPF}_6$  as supporting electrolyte under an argon atmosphere. (b) Plot of the reduction peak currents versus the square root of the scan rates.

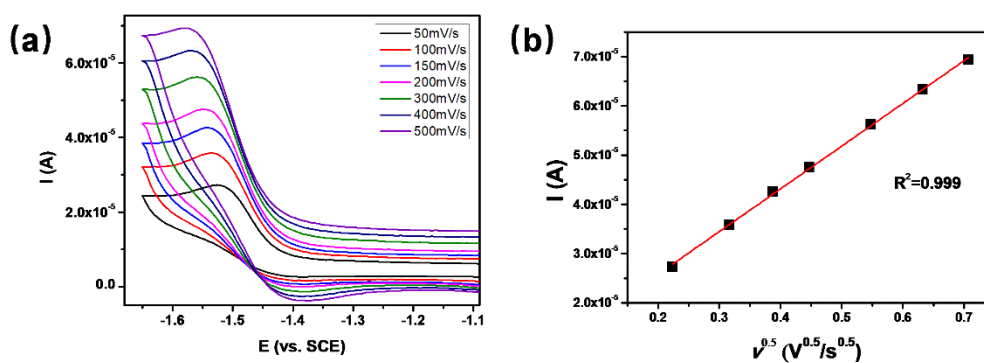

**Figure S15.** (a) CVs of 1.0 mM C2 under various scan rates in anhydrous CH<sub>3</sub>CN with 0.1 M TBAPF<sub>6</sub> as supporting electrolyte under an argon atmosphere. (b) Plot of the reduction peak currents versus the square root of the scan rates.

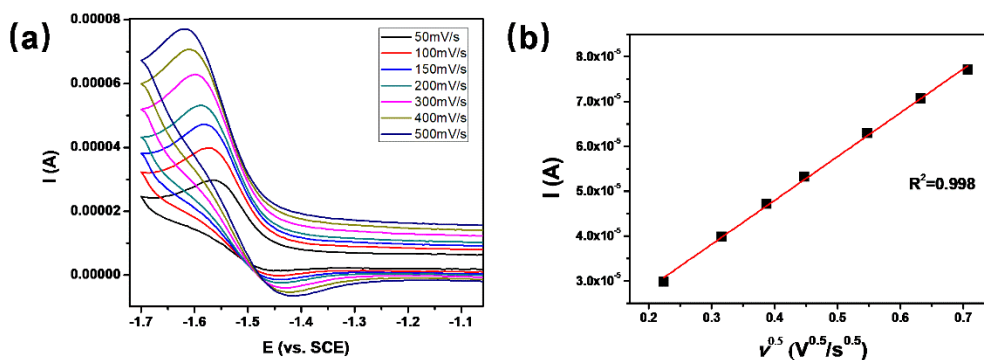

**Figure S16.** (a) CVs of 1.0 mM C3 under various scan rates in anhydrous CH<sub>3</sub>CN with 0.1 M TBAPF<sub>6</sub> as supporting electrolyte under an argon atmosphere. (b) Plots of the reduction peak currents versus the square root of the scan rates.

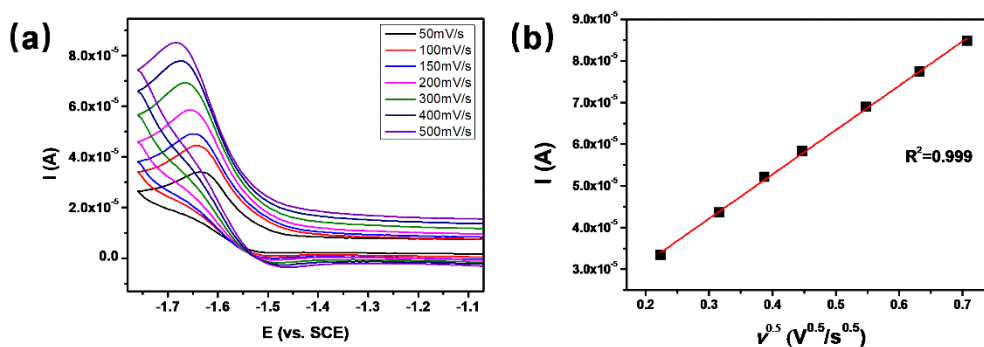

**Figure S17.** (a) CVs of 1.0 mM C4 under various scan rates in anhydrous CH<sub>3</sub>CN with 0.1 M TBAPF<sub>6</sub> as supporting electrolyte under an argon atmosphere. (b) Plots of the reduction peak currents versus the square root of the scan rates.

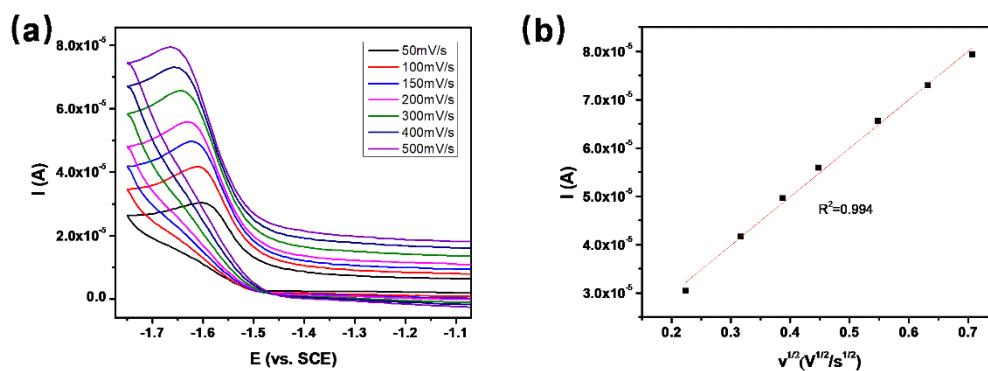

**Figure S18.** (a) CVs of 1.0 mM C5 under various scan rates in anhydrous CH<sub>3</sub>CN with 0.1 M TBAPF<sub>6</sub> as supporting electrolyte under an argon atmosphere. (b) Plots of the reduction peak currents versus the square root of the scan rates.

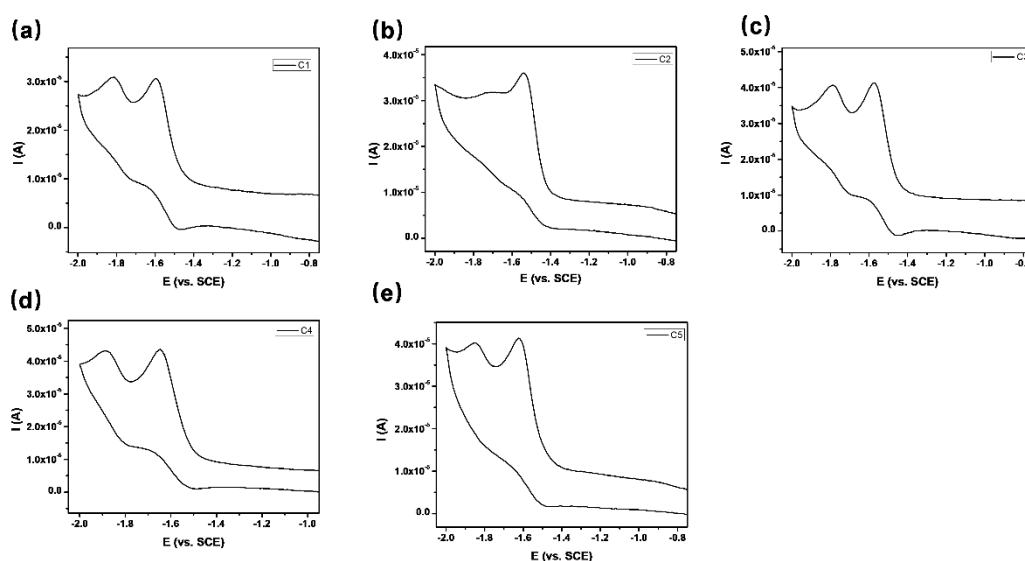

**Figure S19.** Wider range CVs of 1.0 mM C1-C5 (a-e) in anhydrous CH<sub>3</sub>CN with 0.1 M TBAPF<sub>6</sub> as supporting electrolyte under an argon atmosphere with scan rate of 100 mV/s.

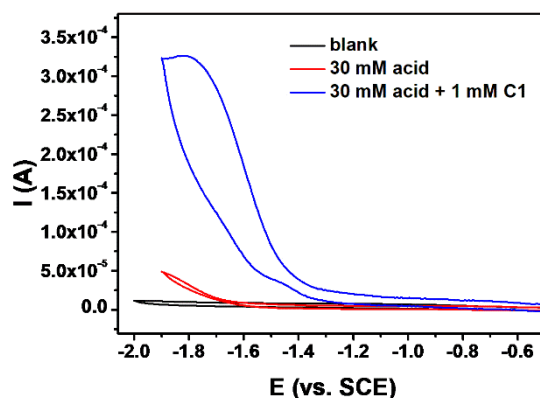

**Figure S20.** CVs of blank, 30 mM acetic acid and 30 mM acetic acid with 1 mM C1 in Ar-saturated 0.1 M TBAPF<sub>6</sub> anhydrous CH<sub>3</sub>CN at a scan rate of 100 mV/s.

**Table S2.** Faradaic efficiencies of 1 mM C1-C5 in controlled-potential electrolysis.

|    | Charge / C | $n(\text{H}_2)_{\text{tested}} / \text{mmol}$ | $n(\text{H}_2)_{\text{calcd}} / \text{mmol}$ | Faradaic Efficiency / % |
|----|------------|-----------------------------------------------|----------------------------------------------|-------------------------|
| C1 | 1.44       | 0.00668                                       | 0.00749                                      | 89.2                    |
| C2 | 1.26       | 0.00587                                       | 0.00655                                      | 89.7                    |
| C3 | 1.35       | 0.00621                                       | 0.00700                                      | 88.7                    |
| C4 | 1.59       | 0.00745                                       | 0.00824                                      | 90.4                    |
| C5 | 1.46       | 0.00667                                       | 0.00759                                      | 87.9                    |

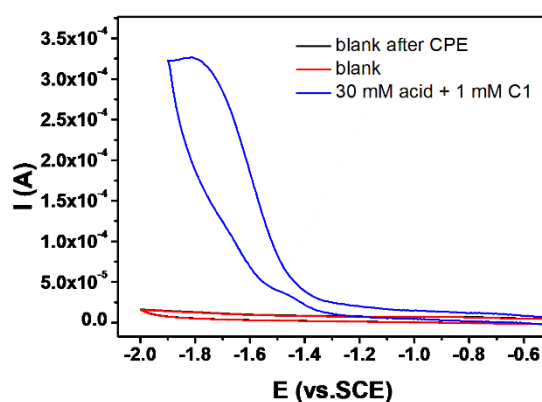

**Figure S21.** CVs of electrolyte solution using a same glassy carbon working electrode before and after use for electrolysis compared with CV of 1.0 mM C1 with 30 mM acetic acid, The GC electrode after CPE experiment was rinsed by ethonal, water and used without further polishing.

## 7. Photocatalytic experiments

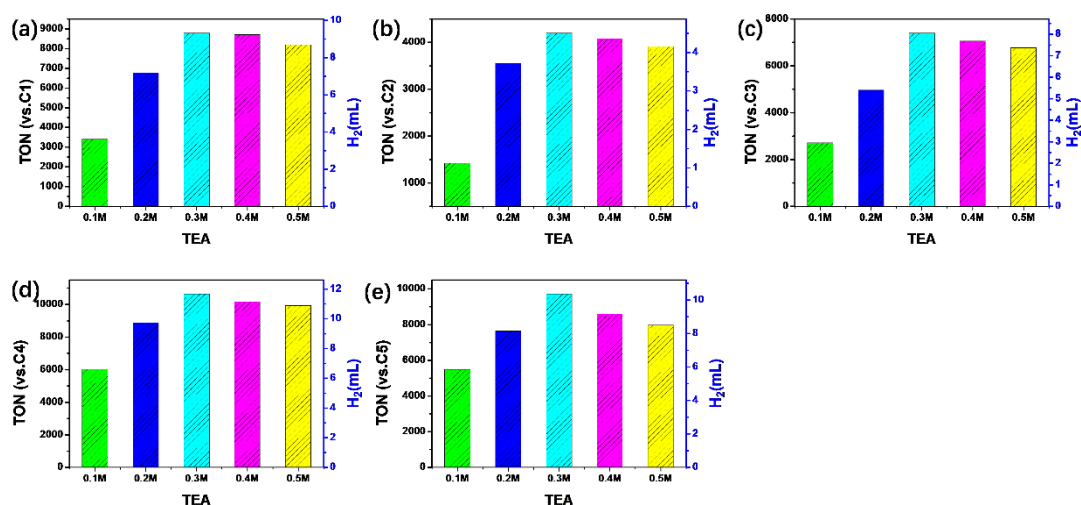

**Figure S22.** Photocatalytic  $\text{H}_2$  evolution of C1-C5 (a-d) after 6 h irradiation at various concentrations of TEA. Conditions: 0.2 mM  $[\text{Ir}(\text{ppy})_2(\text{dtbpy})]\text{Cl}$ ,  $\text{CH}_3\text{CN}/\text{H}_2\text{O}$  (8:2,v/v), 10  $\mu\text{M}$

Co complex.

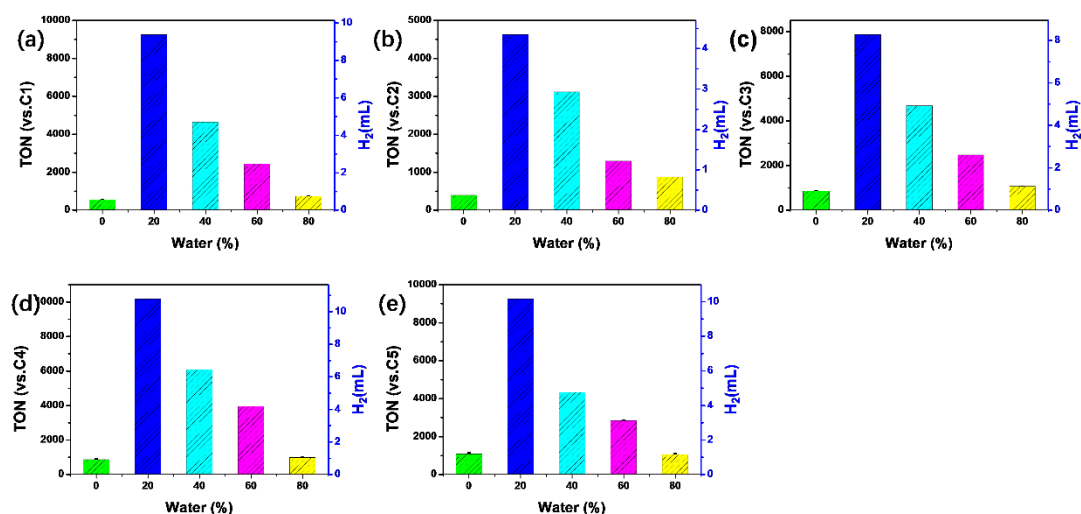

**Figure S23.** Photocatalytic H<sub>2</sub> evolution of C1-C5 (a-d) after 6 h irradiation in CH<sub>3</sub>CN/H<sub>2</sub>O of varied compositions. Conditions: 0.2 mM [Ir(ppy)<sub>2</sub>(dtbpy)]Cl, 0.3 M TEA, 10 μM Co complex.

**Table S3.** Photocatalytic control experiments with specific absent part, a typical complete system including 0.3 M TEA, 0.2 mM [Ir(ppy)<sub>2</sub>(dtbpy)]Cl, 10 μM C1 and irradiation of 6 hours, the solvent was a mixture of CH<sub>3</sub>CN/H<sub>2</sub>O (8:2, v/v).

| Absent Part         | PS | Cat   | SD | Light |
|---------------------|----|-------|----|-------|
| H <sub>2</sub> μmol | 0  | 0.628 | 0  | 0     |

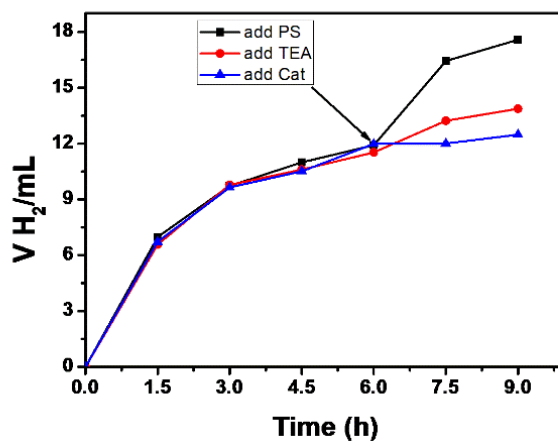

**Figure S24.** Consecutive photocatalytic H<sub>2</sub> production by adding 0.3 M TEA, 0.2 mM PS, 10 μM C1 after 6 h irradiation. Initial condition: 0.2 mM [Ir(ppy)<sub>2</sub>(dtbpy)]Cl, 0.3 M TEA, MeCN/H<sub>2</sub>O (8:2), 10 μM C1.

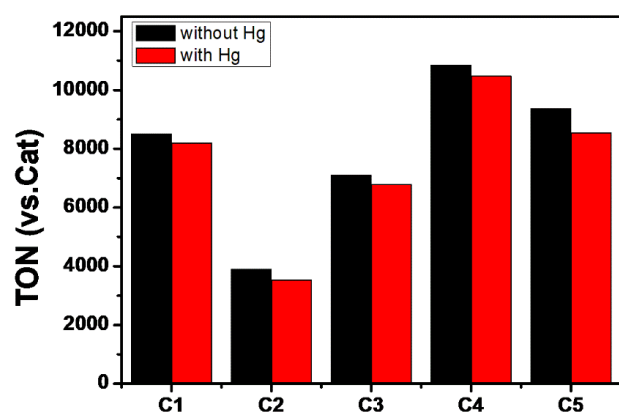

**Figure S25.** Photocatalytic H<sub>2</sub> production with or without Hg (10% volume) after 6 h irradiation. Conditions: 0.2 mM [Ir(ppy)<sub>2</sub>(dtbpy)]Cl, CH<sub>3</sub>CN/H<sub>2</sub>O (8:2,v/v), 10 μM Co complex, 0.3 M TEA.

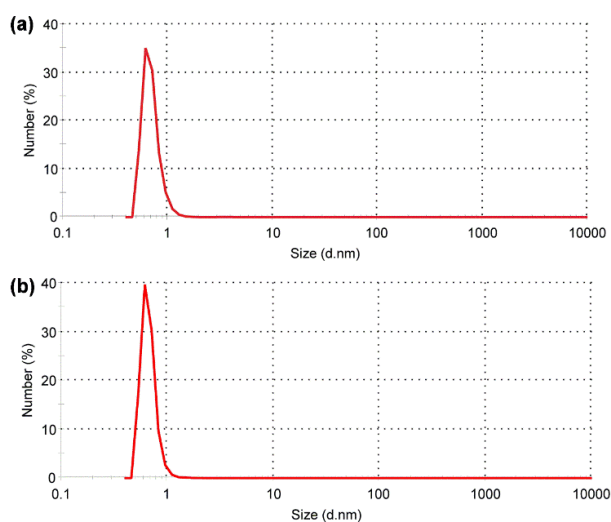

**Figure S26.** Size distribution by number obtained by dynamic light scattering for 10 μM C2 (a) and C4 (b) in CH<sub>3</sub>CN/H<sub>2</sub>O (8:2,v/v) containing 0.2 mM [Ir(ppy)<sub>2</sub>(dtbpy)]Cl and 0.3 M TEA after 6 h of irradiation.

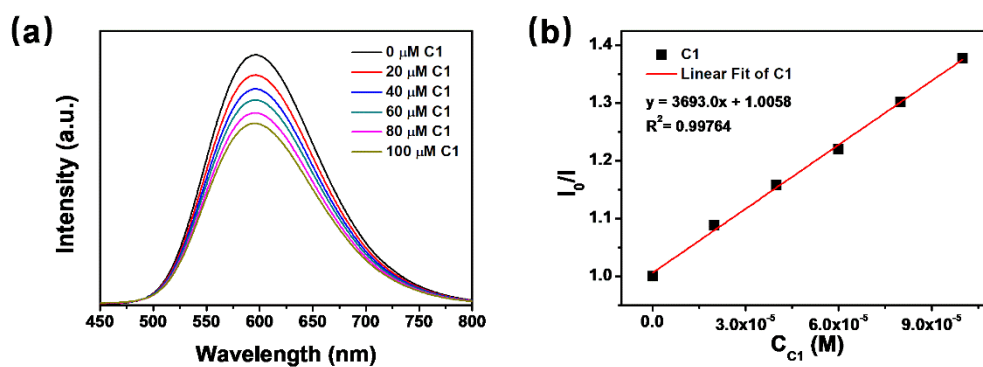

**Figure S27.** (a) Emission quenching of [Ir(ppy)<sub>2</sub>(dtbpy)]Cl by C1. (b) Stern-Volmer plot of the emission quenching.

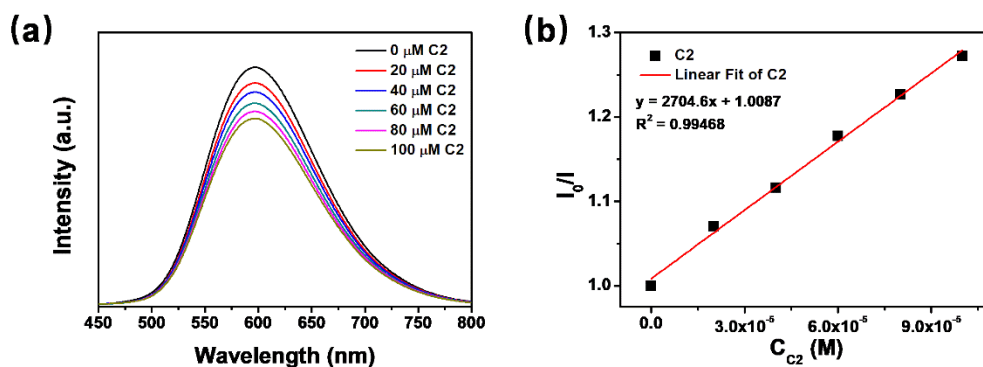

**Figure S28.** (a) Emission quenching of [Ir(ppy)<sub>2</sub>(dtbpy)]Cl by C2. (b) Stern-Volmer plot of the emission quenching.

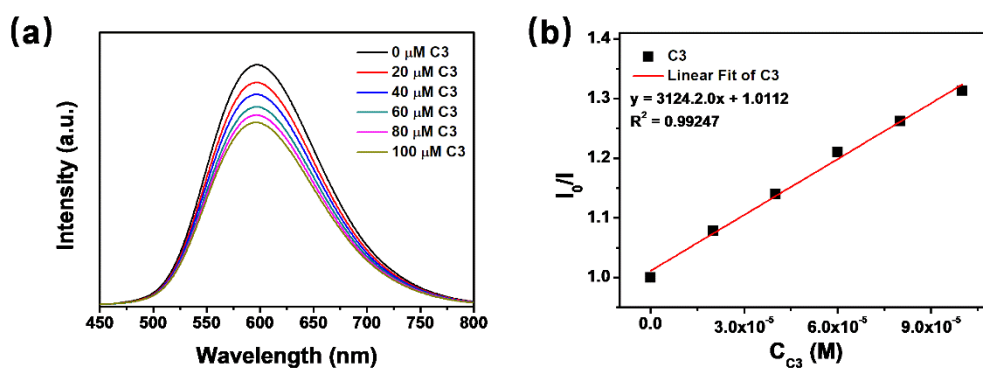

**Figure S29.** (a) Emission quenching of [Ir(ppy)<sub>2</sub>(dtbpy)]Cl by C3. (b) Stern-Volmer plot of the emission quenching.

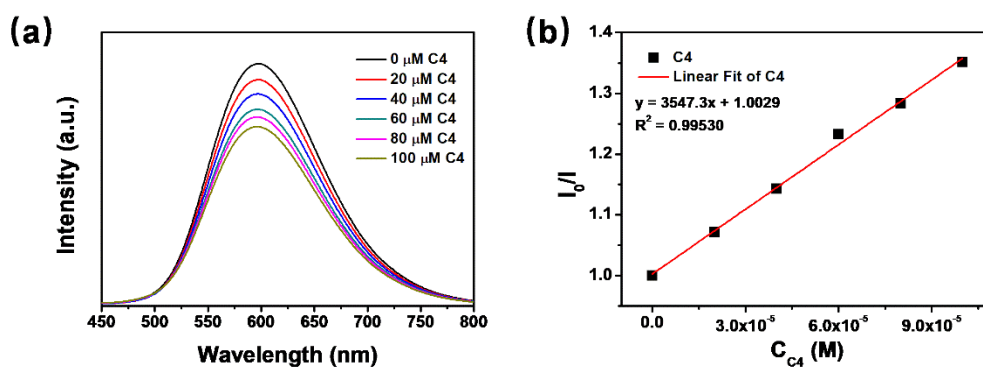

**Figure S30.** (a) Emission quenching of [Ir(ppy)<sub>2</sub>(dtbpy)]Cl by C4. (b) Stern-Volmer plot of the emission quenching.

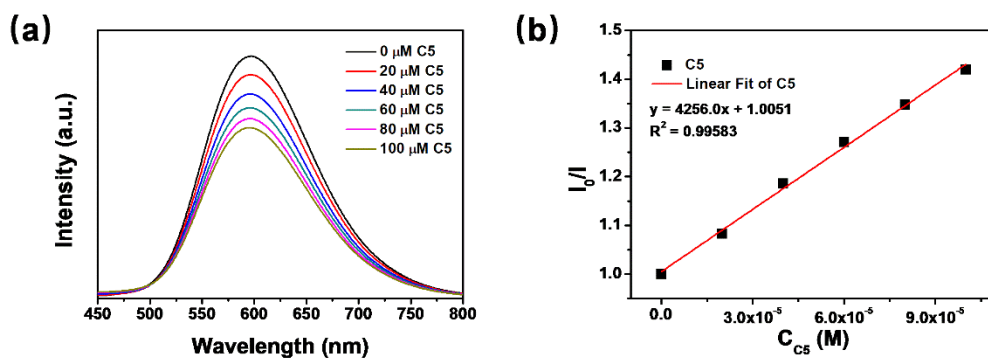

**Figure S31.** (a) Emission quenching of  $[\text{Ir}(\text{ppy})_2(\text{dtbbpy})]\text{Cl}$  by **C5**. (b) Stern-Volmer plot of the emission quenching.

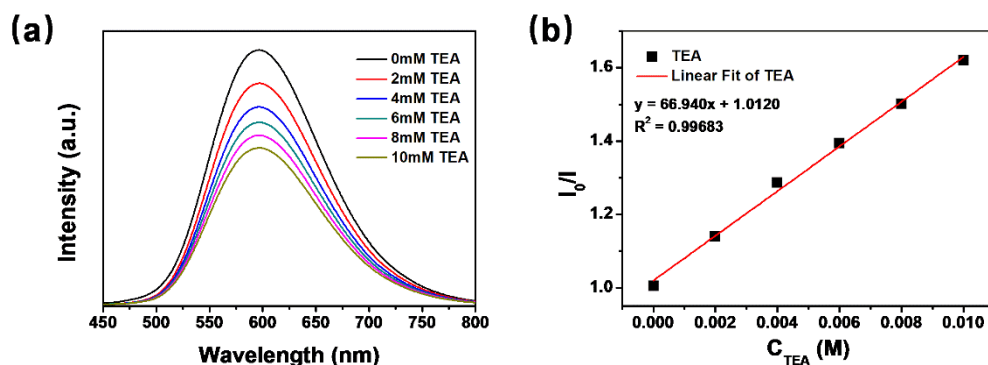

**Figure S32.** (a) Emission quenching of  $[\text{Ir}(\text{ppy})_2(\text{dtbbpy})]\text{Cl}$  by **TEA**. (b) Stern-Volmer plot of the emission quenching.

**Table S4.** Slopes of the Stern-Volmer plots and their quenching rate constants.

|                                              | TEA   | C1   | C2   | C3   | C4   | C5   |
|----------------------------------------------|-------|------|------|------|------|------|
| slope                                        | 66.94 | 3693 | 2704 | 3124 | 3547 | 4256 |
| $k_q$ ( $10^9 \text{ M}^{-1}\text{s}^{-1}$ ) | 0.12  | 6.63 | 4.86 | 5.61 | 6.37 | 7.64 |

## 8. Computation results

**Table S5.** Selected bond lengths ( $\text{\AA}$ ) and angles ( $^\circ$ ) of optimized  $[\text{Co}^{\text{II}}(\text{TPA})\text{Cl}]\text{Cl}$  and crystal data of  $[\text{Co}^{\text{II}}(\text{TPA})\text{Cl}]\text{ClO}_4$  (CCDC 1529343).

|                                                         | Co-N1/ $\text{\AA}$ | Co-N2/ $\text{\AA}$ | Co-N3/ $\text{\AA}$ | Co-Namine/ $\text{\AA}$ | Co-Cl/ $\text{\AA}$ | N1-Co-Cl/ $^\circ$ |
|---------------------------------------------------------|---------------------|---------------------|---------------------|-------------------------|---------------------|--------------------|
| CCDC 1529343                                            | 2.056               | 2.069               | 2.060               | 2.201                   | 2.285               | 104.46             |
| $[\text{Co}^{\text{II}}(\text{TPA})\text{Cl}]\text{Cl}$ | 2.08830             | 2.08863             | 2.08933             | 2.28014                 | 2.33279             | 102.44549          |



**Table S6.** Calculated Gibbs free energies of **C1-C5** in high-spin states or low-spin states (in Hartree), and their difference (the energy of low-spin states minus high-spin states, in kcal/mol)

| Gsol / Hartree                | C1           | C2           | C3           | C4           | C5           |
|-------------------------------|--------------|--------------|--------------|--------------|--------------|
| High-spin states              | -1521.035155 | -1635.567768 | -1635.564391 | -1635.570052 | -1560.340956 |
| Low-spin states               | -1521.015277 | -1635.549582 | -1635.54287  | -1635.549365 | -1560.321824 |
| $\Delta G_{sol}$ / (kcal/mol) | 12.47380693  | 11.41162076  | 13.50468664  | 12.98123662  | 12.00542092  |

**Table S7.** Selected bond lengths (Å) and angles (°) of optimized **C1-C5**.

|           | C1        | C2        | C3        | C4        | C5        |
|-----------|-----------|-----------|-----------|-----------|-----------|
| Co-N1/Å   | 2.08830   | 2.12408   | 2.09123   | 2.07529   | 2.08203   |
| Cl-Co-N1° | 102.44549 | 114.69198 | 103.02949 | 102.63419 | 102.76455 |

**Table S8.** Selected bond lengths (Å) of optimized Co(II)-Cl and Co(I)-Cl intermediates.

|           |           | C1      | C2      | C3      | C4      | C5      |
|-----------|-----------|---------|---------|---------|---------|---------|
| Co-Cl / Å | Co(II)-Cl | 2.33279 | 2.33896 | 2.33146 | 2.33733 | 2.33431 |
|           | Co(I)-Cl  | 2.40166 | 2.41324 | 2.40136 | 2.40517 | 2.40224 |

**Table S9.** The Calculated Gibbs free energy changes (in kcal/mol) during selected bond dissociation from Co(I)-Cl intermediates of C1-C5.

|       | C1           | C2           | C3           | C4           | C5           |
|-------|--------------|--------------|--------------|--------------|--------------|
| Co-N1 | 2.26812862   | 0.756871187  | 0.885586037  | 2.044954689  | 4.63889905   |
| Co-N2 | \            | 0.663936955  | 1.184600827  | 2.362393172  | 2.39799809   |
| Co-Cl | -0.214200539 | -3.982730669 | -0.312763534 | -0.190229656 | -0.199378752 |

**Table S10.** Calculated Gibbs free energies of Co(I) and Co(III)-H intermediates (in Hartrees) and corresponding energy changes (in kJ/mol).

|    | $G_{sol}(\text{Co}^I)$ /Hartree | $G_{sol}(\text{Co}^{III}\text{-H})$ /Hartree | $\Delta G_{sol}$ / kJ/mol |
|----|---------------------------------|----------------------------------------------|---------------------------|
| C1 | -1060.773042                    | -1061.183652                                 | 8.026328403               |
| C2 | -1175.314739                    | -1175.724695                                 | 9.740991145               |
| C3 | -1175.305128                    | -1175.71545                                  | 8.780897632               |
| C4 | -1175.310251                    | -1175.722339                                 | 4.145364093               |
| C5 | -1100.081766                    | -1100.493129                                 | 6.048459095               |

**Table S11.** Selected bond lengths (Å) and angles (°) of optimized Co(III)-H intermediates, N1 is the N atom of pyridine with substituent.

|            | C1       | C2       | C3       | C4       | C5       |
|------------|----------|----------|----------|----------|----------|
| Co-N1 /Å   | 1.99171  | 2.00587  | 1.99178  | 1.96663  | 1.98153  |
| N1-Co-H /° | 96.83926 | 98.21885 | 96.87186 | 96.01514 | 96.48975 |

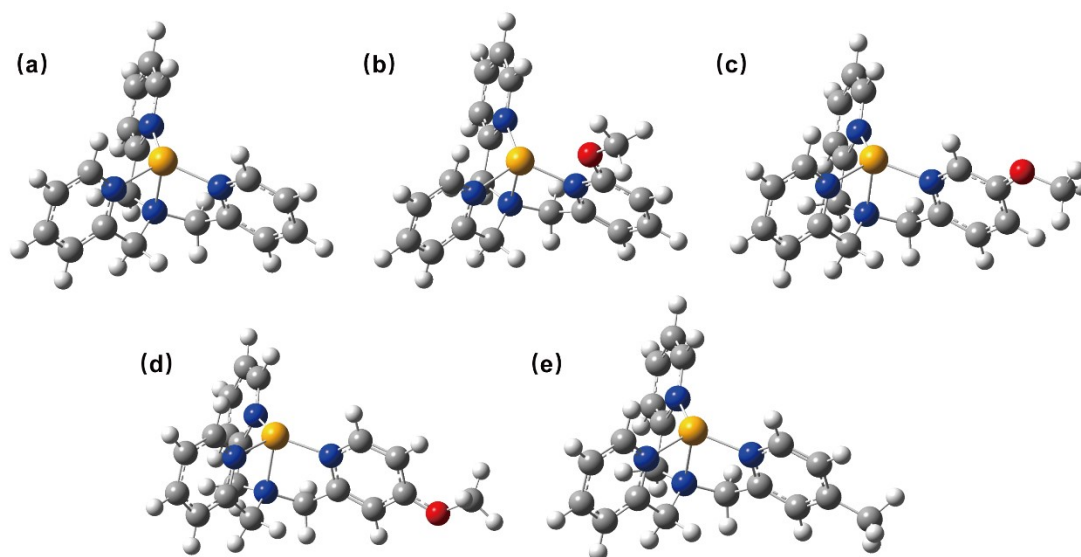

**Figure S33.** Optimized structures of the Co(II) species derived from C1-C5 (a-e).

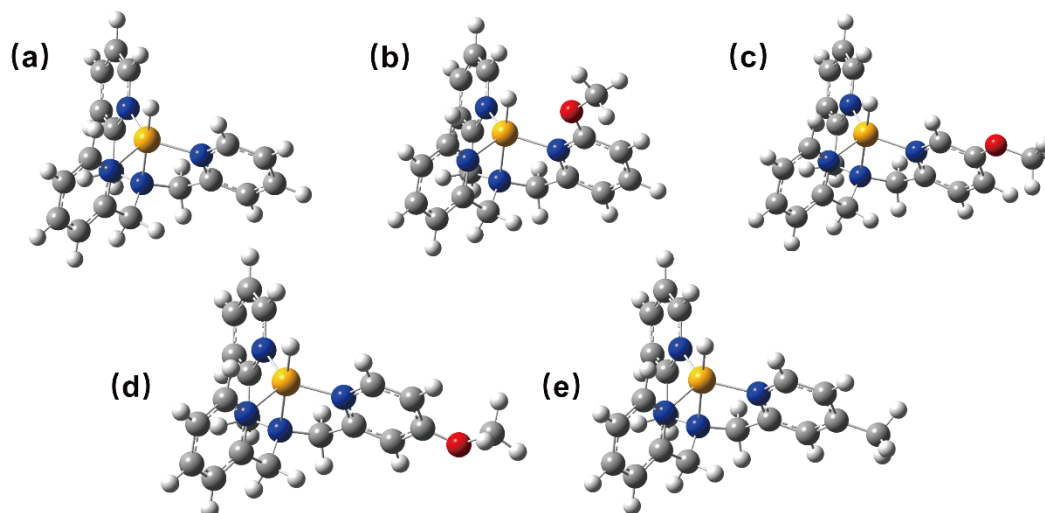

**Figure S34.** Optimized structures of the Co(III)-H intermediates of C1-C5 (a-e).

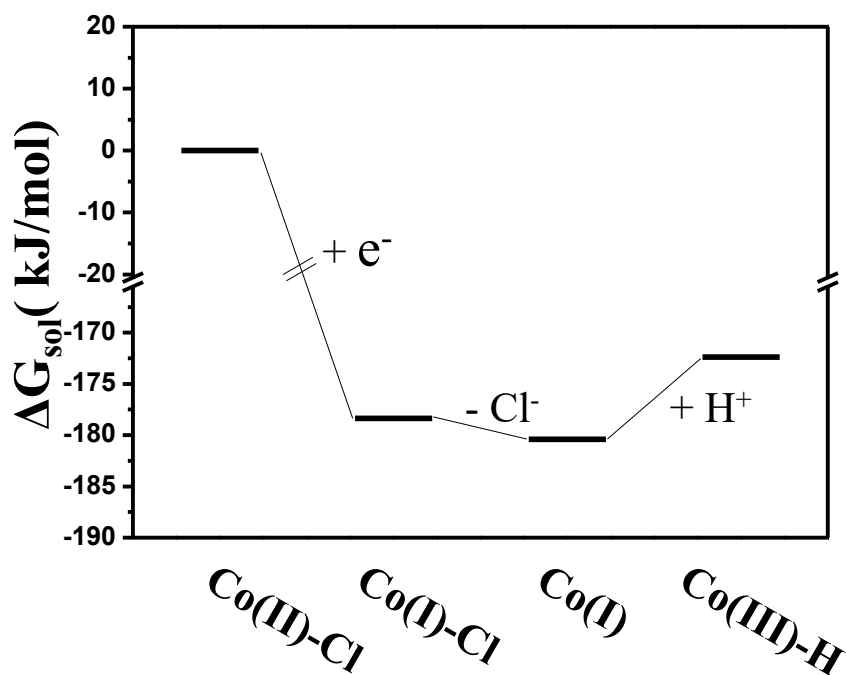

**Figure S35.** DFT-calculated free energy profile for the key intermediates of C1.

### References

1. J. Wang, C. Li, Q. Zhou, W. Wang, Y. Hou, B. Zhang and X. Wang, *Dalton Trans*, 2016, **45**, 5439-5443.
2. D. A. Quist, M. A. Ehudin and K. D. Karlin, *Inorg. Chim. Acta*, 2019, **485**, 155-161.
3. M. A. Ehudin, A. W. Schaefer, S. M. Adam, D. A. Quist, D. E. Diaz, J. A. Tang, E. I. Solomon and K. D. Karlin, *Chem. Sci.*, 2019, **10**, 2893-2905.

**Appendix: Cartesian coordinates of the optimized geometries**

|                                                 |           |           |           |                                                |           |           |           |
|-------------------------------------------------|-----------|-----------|-----------|------------------------------------------------|-----------|-----------|-----------|
| C1                                              |           |           |           | H                                              | -0.537000 | -5.071000 | 1.620000  |
| <b>Co<sup>II</sup>(TPA)Cl (High-spin state)</b> |           |           |           |                                                |           |           |           |
| Co                                              | -0.000000 | 0.001000  | 0.700000  | <b>Co<sup>II</sup>(TPA)Cl (Low-spin state)</b> |           |           |           |
| N                                               | 0.000000  | 0.002000  | -1.580000 | Co                                             | -0.056000 | -0.334000 | 0.517000  |
| C                                               | -3.605000 | 2.438000  | 0.855000  | N                                              | -0.121000 | -0.192000 | -1.494000 |
| H                                               | -4.130000 | 2.995000  | 1.621000  | C                                              | 3.879000  | -2.032000 | 0.880000  |
| C                                               | -2.210000 | 0.980000  | -1.036000 | H                                              | 4.527000  | -2.381000 | 1.677000  |
| N                                               | 1.765000  | 1.024000  | 0.251000  | C                                              | 2.166000  | -1.106000 | -1.057000 |
| N                                               | 0.003000  | -2.038000 | 0.250000  | N                                              | -2.033000 | -0.612000 | 0.294000  |
| C                                               | 1.955000  | 1.423000  | -1.034000 | N                                              | 0.223000  | 1.784000  | 0.339000  |
| C                                               | -2.451000 | 1.726000  | 1.183000  | C                                              | -2.334000 | -1.078000 | -0.942000 |
| H                                               | -2.046000 | 1.695000  | 2.188000  | C                                              | 2.674000  | -1.410000 | 1.196000  |
| C                                               | -1.431000 | 0.088000  | -1.980000 | H                                              | 2.339000  | -1.273000 | 2.218000  |
| H                                               | -1.846000 | -0.926000 | -1.929000 | C                                              | 1.232000  | -0.474000 | -2.066000 |
| H                                               | -1.543000 | 0.430000  | -3.019000 | H                                              | 1.668000  | 0.480000  | -2.380000 |
| N                                               | -1.769000 | 1.016000  | 0.249000  | H                                              | 1.144000  | -1.091000 | -2.969000 |
| C                                               | 4.130000  | 2.296000  | -0.468000 | N                                              | 1.834000  | -0.951000 | 0.245000  |
| H                                               | 5.053000  | 2.787000  | -0.753000 | C                                              | -4.645000 | -1.319000 | -0.338000 |
| C                                               | -3.352000 | 1.681000  | -1.426000 | H                                              | -5.666000 | -1.595000 | -0.587000 |
| H                                               | -3.684000 | 1.649000  | -2.458000 | C                                              | 3.344000  | -1.740000 | -1.447000 |
| C                                               | -0.273000 | -2.983000 | 1.183000  | H                                              | 3.576000  | -1.860000 | -2.501000 |
| C                                               | 3.136000  | 2.056000  | -1.426000 | C                                              | 0.672000  | 2.639000  | 1.271000  |
| H                                               | 3.275000  | 2.359000  | -2.457000 | C                                              | -3.632000 | -1.435000 | -1.295000 |
| C                                               | 0.256000  | -2.402000 | -1.035000 | H                                              | -3.847000 | -1.800000 | -2.295000 |
| C                                               | 3.919000  | 1.894000  | 0.855000  | C                                              | 0.029000  | 2.220000  | -0.919000 |
| H                                               | 4.665000  | 2.068000  | 1.621000  | C                                              | -4.327000 | -0.843000 | 0.934000  |
| C                                               | -0.315000 | -4.338000 | 0.855000  | H                                              | -5.085000 | -0.739000 | 1.703000  |
| C                                               | 0.217000  | -3.741000 | -1.426000 | C                                              | 0.948000  | 3.975000  | 0.976000  |
| H                                               | 0.412000  | -4.013000 | -2.457000 | C                                              | 0.295000  | 3.534000  | -1.300000 |
| C                                               | 2.723000  | 1.255000  | 1.185000  | H                                              | 0.136000  | 3.856000  | -2.326000 |
| H                                               | 2.492000  | 0.922000  | 2.189000  | C                                              | -3.006000 | -0.499000 | 1.216000  |
| C                                               | 0.643000  | -1.281000 | -1.977000 | H                                              | -2.689000 | -0.144000 | 2.190000  |
| H                                               | 1.728000  | -1.133000 | -1.920000 | C                                              | -0.575000 | 1.191000  | -1.852000 |
| H                                               | 0.408000  | -1.549000 | -3.017000 | H                                              | -1.664000 | 1.220000  | -1.743000 |
| C                                               | -4.059000 | 2.419000  | -0.468000 | H                                              | -0.348000 | 1.407000  | -2.904000 |
| H                                               | -4.949000 | 2.968000  | -0.752000 | C                                              | 4.217000  | -2.208000 | -0.463000 |
| C                                               | -0.071000 | -4.722000 | -0.468000 | H                                              | 5.142000  | -2.704000 | -0.742000 |
| H                                               | -0.104000 | -5.767000 | -0.753000 | C                                              | 0.762000  | 4.427000  | -0.331000 |
| C                                               | 0.792000  | 1.199000  | -1.976000 | H                                              | 0.976000  | 5.458000  | -0.595000 |
| H                                               | 0.122000  | 2.066000  | -1.919000 | C                                              | -1.148000 | -1.202000 | -1.879000 |
| H                                               | 1.141000  | 1.130000  | -3.017000 | H                                              | -0.692000 | -2.194000 | -1.772000 |
| Cl                                              | -0.000000 | 0.001000  | 3.033000  | H                                              | -1.450000 | -1.087000 | -2.929000 |
| H                                               | -0.448000 | -2.616000 | 2.188000  | Cl                                             | -0.075000 | -0.555000 | 2.752000  |

|   |          |          |          |
|---|----------|----------|----------|
| H | 0.802000 | 2.224000 | 2.266000 |
| H | 1.306000 | 4.639000 | 1.757000 |

|   |           |           |          |
|---|-----------|-----------|----------|
| H | -2.698000 | -0.013000 | 2.239000 |
| H | -5.071000 | 0.546000  | 1.641000 |

**Co<sup>I</sup>(TPA)Cl**

|    |           |           |           |
|----|-----------|-----------|-----------|
| Co | -0.064000 | -0.016000 | 0.709000  |
| N  | -0.034000 | 0.034000  | -1.609000 |
| C  | 2.617000  | 3.472000  | 0.863000  |
| H  | 3.219000  | 3.958000  | 1.625000  |
| C  | 1.051000  | 2.168000  | -0.985000 |
| N  | 1.006000  | -1.738000 | 0.223000  |
| N  | -2.078000 | -0.244000 | 0.285000  |
| C  | 1.363000  | -1.940000 | -1.067000 |
| C  | 1.899000  | 2.320000  | 1.176000  |
| H  | 1.899000  | 1.880000  | 2.170000  |
| C  | 0.089000  | 1.458000  | -1.925000 |
| H  | -0.908000 | 1.903000  | -1.799000 |
| H  | 0.384000  | 1.635000  | -2.975000 |
| N  | 1.142000  | 1.672000  | 0.270000  |
| C  | 2.225000  | -4.132000 | -0.561000 |
| H  | 2.688000  | -5.065000 | -0.870000 |
| C  | 1.755000  | 3.308000  | -1.377000 |
| H  | 1.674000  | 3.671000  | -2.399000 |
| C  | -3.033000 | 0.029000  | 1.206000  |
| C  | 1.959000  | -3.124000 | -1.495000 |
| H  | 2.215000  | -3.254000 | -2.544000 |
| C  | -2.425000 | -0.198000 | -1.030000 |
| C  | 1.879000  | -3.910000 | 0.776000  |
| H  | 2.069000  | -4.658000 | 1.540000  |
| C  | -4.344000 | 0.343000  | 0.859000  |
| C  | -3.713000 | 0.118000  | -1.449000 |
| H  | -3.943000 | 0.148000  | -2.512000 |
| C  | 1.270000  | -2.707000 | 1.125000  |
| H  | 0.972000  | -2.477000 | 2.145000  |
| C  | -1.319000 | -0.568000 | -2.000000 |
| H  | -1.183000 | -1.655000 | -1.970000 |
| H  | -1.605000 | -0.305000 | -3.033000 |
| C  | 2.552000  | 3.972000  | -0.441000 |
| H  | 3.107000  | 4.863000  | -0.724000 |
| C  | -4.701000 | 0.392000  | -0.492000 |
| H  | -5.714000 | 0.641000  | -0.797000 |
| C  | 1.134000  | -0.764000 | -2.003000 |
| H  | 2.013000  | -0.111000 | -1.947000 |
| H  | 1.064000  | -1.112000 | -3.048000 |
| Cl | -0.015000 | 0.022000  | 3.110000  |

**Co<sup>I</sup>(TPA)**

|    |           |           |           |
|----|-----------|-----------|-----------|
| Co | -0.025000 | 0.121000  | 0.844000  |
| N  | 0.030000  | 0.153000  | -1.306000 |
| C  | -3.891000 | 2.082000  | 1.212000  |
| H  | -4.511000 | 2.490000  | 2.004000  |
| C  | -2.250000 | 0.990000  | -0.711000 |
| N  | 1.871000  | 0.908000  | 0.617000  |
| N  | 0.043000  | -1.939000 | 0.533000  |
| C  | 2.049000  | 1.422000  | -0.626000 |
| C  | -2.765000 | 1.327000  | 1.531000  |
| H  | -2.496000 | 1.136000  | 2.565000  |
| C  | -1.374000 | 0.281000  | -1.736000 |
| H  | -1.769000 | -0.734000 | -1.860000 |
| H  | -1.461000 | 0.775000  | -2.715000 |
| N  | -1.952000 | 0.787000  | 0.598000  |
| C  | 4.270000  | 2.171000  | -0.066000 |
| H  | 5.202000  | 2.659000  | -0.337000 |
| C  | -3.354000 | 1.745000  | -1.105000 |
| H  | -3.558000 | 1.893000  | -2.162000 |
| C  | -0.230000 | -2.931000 | 1.403000  |
| C  | 3.239000  | 2.047000  | -0.999000 |
| H  | 3.353000  | 2.435000  | -2.007000 |
| C  | 0.264000  | -2.266000 | -0.763000 |
| C  | 4.084000  | 1.649000  | 1.215000  |
| H  | 4.858000  | 1.716000  | 1.973000  |
| C  | -0.293000 | -4.273000 | 1.032000  |
| C  | 0.201000  | -3.584000 | -1.214000 |
| H  | 0.372000  | -3.805000 | -2.264000 |
| C  | 2.875000  | 1.023000  | 1.510000  |
| H  | 2.694000  | 0.591000  | 2.489000  |
| C  | 0.654000  | -1.128000 | -1.695000 |
| H  | 1.740000  | -0.997000 | -1.635000 |
| H  | 0.426000  | -1.394000 | -2.738000 |
| C  | -4.190000 | 2.300000  | -0.133000 |
| H  | -5.055000 | 2.890000  | -0.423000 |
| C  | -0.077000 | -4.607000 | -0.305000 |
| H  | -0.127000 | -5.640000 | -0.636000 |
| C  | 0.871000  | 1.328000  | -1.590000 |
| H  | 0.242000  | 2.218000  | -1.463000 |
| H  | 1.235000  | 1.341000  | -2.630000 |
| H  | -0.407000 | -2.628000 | 2.431000  |

H -0.513000 -5.031000 1.777000

H -0.003000 0.001000 -2.263000

**Co<sup>III</sup>-H(TPA)**

Co -0.002000 -0.000000 -0.760000  
N -0.001000 -0.002000 1.307000  
C 0.935000 4.159000 -1.210000  
H 0.930000 4.897000 -2.006000  
C 0.922000 2.215000 0.749000  
N -1.925000 -0.462000 -0.523000  
N 1.361000 -1.435000 -0.524000  
C -2.383000 -0.311000 0.749000  
C 0.568000 2.846000 -1.484000  
H 0.272000 2.533000 -2.479000  
C 0.959000 1.060000 1.726000  
H 1.965000 0.623000 1.721000  
H 0.757000 1.392000 2.752000  
N 0.564000 1.895000 -0.523000  
C -4.548000 -1.126000 0.093000  
H -5.573000 -1.388000 0.338000  
C 1.287000 3.514000 1.089000  
H 1.562000 3.754000 2.112000  
C 2.185000 -1.912000 -1.485000  
C -3.691000 -0.643000 1.088000  
H -4.037000 -0.523000 2.110000  
C 1.461000 -1.907000 0.748000  
C -4.072000 -1.270000 -1.212000  
H -4.708000 -1.641000 -2.009000  
C 3.142000 -2.883000 -1.211000  
C 2.406000 -2.869000 1.088000  
H 2.476000 -3.228000 2.110000  
C -2.751000 -0.932000 -1.485000  
H -2.331000 -1.032000 -2.479000  
C 0.439000 -1.366000 1.724000  
H -0.443000 -2.018000 1.713000  
H 0.823000 -1.359000 2.751000  
C 1.296000 4.499000 0.096000  
H 1.581000 5.518000 0.341000  
C 3.256000 -3.366000 0.094000  
H 3.999000 -4.120000 0.340000  
C -1.402000 0.297000 1.727000  
H -1.526000 1.386000 1.726000  
H -1.587000 -0.047000 2.753000  
H 2.060000 -1.499000 -2.480000  
H 3.784000 -3.245000 -2.007000

**Co<sup>H</sup>-H(TPA)**

Co -0.000000 0.001000 -1.082000  
N -0.002000 0.001000 1.300000  
C 1.039000 -4.250000 -1.080000  
H 1.385000 -4.945000 -1.838000  
C 0.153000 -2.407000 0.764000  
N 1.590000 1.304000 -0.516000  
N -1.925000 0.724000 -0.517000  
C 2.010000 1.336000 0.765000  
C 0.767000 -2.926000 -1.420000  
H 0.885000 -2.553000 -2.433000  
C -0.416000 -1.354000 1.697000  
H -1.511000 -1.398000 1.635000  
H -0.149000 -1.579000 2.741000  
N 0.336000 -2.027000 -0.516000  
C 3.599000 3.067000 0.246000  
H 4.380000 3.757000 0.549000  
C 0.415000 -3.712000 1.183000  
H 0.268000 -3.991000 2.223000  
C -2.919000 0.801000 -1.421000  
C 3.010000 2.215000 1.184000  
H 3.324000 2.229000 2.224000  
C -2.164000 1.072000 0.764000  
C 3.167000 3.020000 -1.081000  
H 3.599000 3.664000 -1.839000  
C -4.202000 1.225000 -1.082000  
C -3.426000 1.495000 1.182000  
H -3.595000 1.761000 2.222000  
C 2.155000 2.124000 -1.420000  
H 1.774000 2.039000 -2.433000  
C -0.968000 1.037000 1.698000  
H -0.459000 2.007000 1.639000  
H -1.298000 0.916000 2.741000  
C 0.863000 -4.647000 0.247000  
H 1.072000 -5.669000 0.550000  
C -4.459000 1.575000 0.245000  
H -5.449000 1.904000 0.548000  
C 1.379000 0.320000 1.700000  
H 1.964000 -0.606000 1.644000  
H 1.437000 0.667000 2.743000  
H -2.654000 0.513000 -2.434000  
H -4.976000 1.274000 -1.840000

H 0.000000 0.002000 -2.721000

**Co<sup>II</sup>(TPA)**

Co 0.000000 -0.002000 -0.822000  
N 0.001000 -0.002000 1.310000  
C 4.019000 -1.587000 -1.197000  
H 4.761000 -1.706000 -1.979000  
C 2.065000 -1.247000 0.725000  
N -0.155000 2.008000 -0.556000  
N -1.664000 -1.138000 -0.555000  
C 0.049000 2.408000 0.726000  
C 2.778000 -1.037000 -1.496000  
H 2.535000 -0.716000 -2.504000  
C 0.914000 -1.104000 1.706000  
H 0.335000 -2.035000 1.702000  
H 1.288000 -0.966000 2.729000  
N 1.818000 -0.872000 -0.556000  
C -0.432000 4.689000 0.123000  
H -0.542000 5.735000 0.393000  
C 3.292000 -1.791000 1.094000  
H 3.473000 -2.076000 2.126000  
C -2.290000 -1.884000 -1.494000  
C -0.091000 3.744000 1.095000  
H 0.067000 4.042000 2.127000  
C -2.112000 -1.163000 0.727000  
C -0.633000 4.272000 -1.195000  
H -0.901000 4.974000 -1.977000  
C -3.390000 -2.679000 -1.196000  
C -3.200000 -1.949000 1.095000  
H -3.538000 -1.962000 2.127000  
C -0.491000 2.922000 -1.494000  
H -0.649000 2.551000 -2.503000  
C -1.409000 -0.241000 1.709000  
H -1.925000 0.726000 1.710000  
H -1.475000 -0.638000 2.730000  
C 4.281000 -1.968000 0.122000  
H 5.243000 -2.393000 0.392000  
C -3.851000 -2.714000 0.123000  
H -4.703000 -3.331000 0.393000  
C 0.499000 1.340000 1.707000  
H 1.595000 1.304000 1.705000  
H 0.191000 1.595000 2.729000  
H -1.891000 -1.834000 -2.503000  
H -3.866000 -3.260000 -1.979000

**C2**

**Co<sup>II</sup>(6-MeOTPA)Cl (High-spin state)**

Co 0.081000 0.025000 0.575000  
N 0.687000 0.029000 -1.640000  
C 3.406000 -2.696000 1.490000  
H 3.679000 -3.326000 2.327000  
C 2.636000 -1.052000 -0.591000  
N -1.589000 -0.808000 -0.440000  
N 0.271000 2.066000 0.139000  
C -1.377000 -1.328000 -1.678000  
C 2.231000 -1.944000 1.545000  
H 1.576000 -1.942000 2.407000  
C 2.169000 -0.076000 -1.647000  
H 2.569000 0.919000 -1.415000  
H 2.555000 -0.358000 -2.638000  
N 1.853000 -1.143000 0.517000  
C -3.637000 -2.142000 -1.763000  
H -4.433000 -2.670000 -2.275000  
C 3.820000 -1.783000 -0.706000  
H 4.425000 -1.699000 -1.602000  
C 0.337000 3.007000 1.115000  
C -2.382000 -1.996000 -2.373000  
H -2.192000 -2.396000 -3.362000  
C 0.343000 2.433000 -1.167000  
C -3.870000 -1.589000 -0.506000  
H -4.839000 -1.669000 -0.034000  
C 0.479000 4.362000 0.809000  
C 0.499000 3.771000 -1.533000  
H 0.565000 4.044000 -2.580000  
C -2.820000 -0.899000 0.123000  
C 0.187000 1.320000 -2.182000  
H -0.879000 1.192000 -2.403000  
H 0.684000 1.584000 -3.127000  
C 4.210000 -2.616000 0.349000  
H 5.127000 -3.191000 0.280000  
C 0.564000 4.748000 -0.532000  
H 0.682000 5.793000 -0.797000  
C 0.022000 -1.163000 -2.228000  
H 0.621000 -2.039000 -1.953000  
H -0.001000 -1.119000 -3.327000  
Cl -0.108000 0.058000 2.906000  
H 0.270000 2.637000 2.130000

|   |           |           |          |
|---|-----------|-----------|----------|
| H | 0.526000  | 5.091000  | 1.608000 |
| O | -2.912000 | -0.239000 | 1.300000 |
| C | -4.076000 | -0.407000 | 2.177000 |
| H | -4.963000 | 0.049000  | 1.727000 |
| H | -4.245000 | -1.467000 | 2.386000 |
| H | -3.798000 | 0.115000  | 3.089000 |

**Co<sup>II</sup>(6-MeOTPA)Cl (Low-spin state)**

|    |           |           |           |
|----|-----------|-----------|-----------|
| Co | -0.000000 | -0.423000 | -0.604000 |
| N  | -0.000000 | -1.280000 | 1.383000  |
| C  | 4.244000  | -0.136000 | -1.005000 |
| H  | 4.956000  | 0.345000  | -1.668000 |
| C  | 2.350000  | -1.337000 | 0.595000  |
| N  | 0.000000  | 1.297000  | 0.429000  |
| N  | -1.957000 | -0.551000 | -0.432000 |
| C  | 0.000000  | 1.210000  | 1.770000  |
| C  | 2.878000  | 0.029000  | -1.218000 |
| H  | 2.495000  | 0.628000  | -2.038000 |
| C  | 1.251000  | -2.067000 | 1.349000  |
| H  | 1.044000  | -2.992000 | 0.800000  |
| H  | 1.595000  | -2.344000 | 2.357000  |
| N  | 1.956000  | -0.551000 | -0.432000 |
| C  | 0.001000  | 3.599000  | 1.958000  |
| H  | 0.001000  | 4.505000  | 2.558000  |
| C  | 3.702000  | -1.533000 | 0.877000  |
| H  | 3.996000  | -2.162000 | 1.712000  |
| C  | -2.878000 | 0.030000  | -1.218000 |
| C  | 0.001000  | 2.348000  | 2.576000  |
| H  | 0.001000  | 2.256000  | 3.658000  |
| C  | -2.351000 | -1.337000 | 0.595000  |
| C  | 0.001000  | 3.694000  | 0.568000  |
| H  | 0.001000  | 4.659000  | 0.077000  |
| C  | -4.244000 | -0.134000 | -1.005000 |
| C  | -3.703000 | -1.532000 | 0.877000  |
| H  | -3.996000 | -2.161000 | 1.712000  |
| C  | 0.000000  | 2.503000  | -0.168000 |
| C  | -1.252000 | -2.067000 | 1.349000  |
| H  | -1.595000 | -2.344000 | 2.356000  |
| H  | -1.044000 | -2.992000 | 0.800000  |
| C  | 4.663000  | -0.926000 | 0.066000  |
| H  | 5.721000  | -1.073000 | 0.264000  |
| C  | -4.663000 | -0.925000 | 0.066000  |
| H  | -5.721000 | -1.071000 | 0.265000  |
| C  | -0.000000 | -0.188000 | 2.379000  |

|    |           |           |           |
|----|-----------|-----------|-----------|
| H  | 0.876000  | -0.283000 | 3.032000  |
| H  | -0.877000 | -0.283000 | 3.032000  |
| Cl | -0.000000 | -2.161000 | -2.037000 |
| H  | -2.495000 | 0.628000  | -2.038000 |
| H  | -4.956000 | 0.346000  | -1.668000 |
| O  | 0.000000  | 2.412000  | -1.512000 |
| C  | 0.001000  | 3.617000  | -2.296000 |
| H  | -0.899000 | 4.210000  | -2.096000 |
| H  | 0.900000  | 4.209000  | -2.096000 |
| H  | 0.000000  | 3.285000  | -3.334000 |

**Co<sup>I</sup>(6-MeOTPA)Cl**

|    |           |           |           |
|----|-----------|-----------|-----------|
| Co | 0.077000  | 0.059000  | 0.584000  |
| N  | 0.699000  | 0.064000  | -1.656000 |
| C  | 3.077000  | -3.130000 | 1.339000  |
| H  | 3.282000  | -3.830000 | 2.143000  |
| C  | 2.474000  | -1.306000 | -0.624000 |
| N  | -1.627000 | -0.712000 | -0.427000 |
| N  | 0.172000  | 2.117000  | 0.172000  |
| C  | -1.501000 | -1.059000 | -1.729000 |
| C  | 1.962000  | -2.297000 | 1.410000  |
| H  | 1.290000  | -2.295000 | 2.264000  |
| C  | 2.135000  | -0.214000 | -1.628000 |
| H  | 2.641000  | 0.711000  | -1.319000 |
| H  | 2.533000  | -0.478000 | -2.624000 |
| N  | 1.655000  | -1.414000 | 0.442000  |
| C  | -3.836000 | -1.582000 | -1.911000 |
| H  | -4.696000 | -1.914000 | -2.485000 |
| C  | 3.604000  | -2.113000 | -0.775000 |
| H  | 4.233000  | -2.008000 | -1.655000 |
| C  | 0.278000  | 3.045000  | 1.151000  |
| C  | -2.573000 | -1.486000 | -2.506000 |
| H  | -2.423000 | -1.740000 | -3.552000 |
| C  | 0.555000  | 2.468000  | -1.083000 |
| C  | -3.983000 | -1.237000 | -0.566000 |
| H  | -4.950000 | -1.294000 | -0.082000 |
| C  | 0.748000  | 4.335000  | 0.919000  |
| C  | 1.051000  | 3.733000  | -1.386000 |
| H  | 1.356000  | 3.964000  | -2.404000 |
| C  | -2.852000 | -0.799000 | 0.137000  |
| C  | 0.353000  | 1.406000  | -2.147000 |
| H  | -0.710000 | 1.385000  | -2.414000 |
| H  | 0.908000  | 1.667000  | -3.064000 |
| C  | 3.911000  | -3.042000 | 0.221000  |



|    |           |           |           |
|----|-----------|-----------|-----------|
| H  | 4.786000  | -3.680000 | 0.128000  |
| C  | 1.147000  | 4.695000  | -0.372000 |
| H  | 1.529000  | 5.689000  | -0.585000 |
| C  | -0.088000 | -1.007000 | -2.279000 |
| H  | 0.405000  | -1.957000 | -2.041000 |
| H  | -0.108000 | -0.922000 | -3.379000 |
| Cl | 0.121000  | 0.140000  | 2.995000  |
| H  | -0.013000 | 2.702000  | 2.140000  |
| H  | 0.806000  | 5.040000  | 1.744000  |
| O  | -2.852000 | -0.415000 | 1.422000  |
| C  | -4.044000 | -0.501000 | 2.192000  |
| H  | -4.823000 | 0.162000  | 1.794000  |
| H  | -4.416000 | -1.533000 | 2.231000  |
| H  | -3.757000 | -0.176000 | 3.193000  |

**Co<sup>I</sup>(6-MeOTPA)**

|    |           |           |           |
|----|-----------|-----------|-----------|
| Co | 0.105000  | -0.114000 | 0.615000  |
| N  | 0.558000  | -0.079000 | -1.499000 |
| C  | 3.461000  | -2.639000 | 1.734000  |
| H  | 3.812000  | -3.157000 | 2.621000  |
| C  | 2.495000  | -1.257000 | -0.443000 |
| N  | -1.753000 | -0.664000 | -0.111000 |
| N  | 0.422000  | 1.931000  | 0.423000  |
| C  | -1.714000 | -1.073000 | -1.400000 |
| C  | 2.411000  | -1.728000 | 1.831000  |
| H  | 1.935000  | -1.526000 | 2.786000  |
| C  | 1.995000  | -0.398000 | -1.597000 |
| H  | 2.542000  | 0.552000  | -1.562000 |
| H  | 2.246000  | -0.870000 | -2.558000 |
| N  | 1.926000  | -1.046000 | 0.772000  |
| C  | -4.071000 | -1.505000 | -1.381000 |
| H  | -4.981000 | -1.830000 | -1.877000 |
| C  | 3.541000  | -2.161000 | -0.619000 |
| H  | 3.966000  | -2.311000 | -1.607000 |
| C  | 0.628000  | 2.842000  | 1.394000  |
| C  | -2.857000 | -1.491000 | -2.075000 |
| H  | -2.802000 | -1.801000 | -3.113000 |
| C  | 0.553000  | 2.328000  | -0.866000 |
| C  | -4.118000 | -1.100000 | -0.050000 |
| C  | 0.970000  | 4.168000  | 1.134000  |
| C  | 0.910000  | 3.633000  | -1.206000 |
| H  | 1.019000  | 3.910000  | -2.251000 |
| C  | -2.922000 | -0.679000 | 0.552000  |
| C  | 0.226000  | 1.293000  | -1.932000 |

|   |           |           |           |
|---|-----------|-----------|-----------|
| H | -0.854000 | 1.325000  | -2.117000 |
| H | 0.718000  | 1.552000  | -2.882000 |
| C | 4.037000  | -2.864000 | 0.483000  |
| H | 4.852000  | -3.571000 | 0.365000  |
| C | 1.118000  | 4.572000  | -0.193000 |
| H | 1.394000  | 5.594000  | -0.437000 |
| C | -0.338000 | -1.104000 | -2.058000 |
| H | 0.119000  | -2.082000 | -1.858000 |
| H | -0.443000 | -1.019000 | -3.152000 |
| H | 0.515000  | 2.484000  | 2.413000  |
| H | 1.122000  | 4.859000  | 1.957000  |
| H | -5.053000 | -1.105000 | 0.497000  |
| O | -2.803000 | -0.253000 | 1.824000  |
| C | -3.968000 | -0.219000 | 2.661000  |
| H | -3.620000 | 0.152000  | 3.624000  |
| H | -4.721000 | 0.465000  | 2.253000  |
| H | -4.390000 | -1.222000 | 2.782000  |

**Co<sup>III</sup>-H(6-MeOTPA)**

|    |           |           |           |
|----|-----------|-----------|-----------|
| Co | 0.101000  | -0.008000 | 0.556000  |
| N  | 0.639000  | 0.004000  | -1.453000 |
| C  | 2.775000  | -3.165000 | 1.698000  |
| H  | 2.921000  | -3.815000 | 2.554000  |
| C  | 2.335000  | -1.463000 | -0.430000 |
| N  | -1.682000 | -0.534000 | -0.198000 |
| N  | 0.633000  | 1.920000  | 0.446000  |
| C  | -1.656000 | -0.895000 | -1.514000 |
| C  | 1.763000  | -2.212000 | 1.719000  |
| H  | 1.104000  | -2.100000 | 2.572000  |
| C  | 2.062000  | -0.434000 | -1.506000 |
| H  | 2.691000  | 0.445000  | -1.324000 |
| H  | 2.322000  | -0.815000 | -2.502000 |
| N  | 1.549000  | -1.378000 | 0.676000  |
| C  | -4.025000 | -1.227000 | -1.501000 |
| H  | -4.945000 | -1.498000 | -2.010000 |
| C  | 3.356000  | -2.404000 | -0.518000 |
| H  | 3.968000  | -2.463000 | -1.413000 |
| C  | 0.858000  | 2.741000  | 1.496000  |
| C  | -2.806000 | -1.237000 | -2.200000 |
| H  | -2.764000 | -1.514000 | -3.248000 |
| C  | 0.806000  | 2.381000  | -0.821000 |
| C  | -4.062000 | -0.866000 | -0.162000 |
| H  | -4.998000 | -0.850000 | 0.380000  |
| C  | 1.265000  | 4.059000  | 1.320000  |

|   |           |           |           |   |           |           |           |
|---|-----------|-----------|-----------|---|-----------|-----------|-----------|
| C | 1.223000  | 3.686000  | -1.063000 | H | -0.980000 | 5.021000  | -1.907000 |
| H | 1.363000  | 4.034000  | -2.082000 | C | -3.285000 | -2.910000 | -1.620000 |
| C | -2.860000 | -0.508000 | 0.474000  | C | -3.658000 | -2.043000 | 0.596000  |
| C | 0.455000  | 1.405000  | -1.925000 | H | -4.223000 | -2.008000 | 1.523000  |
| H | -0.601000 | 1.533000  | -2.188000 | C | -0.587000 | 2.972000  | -1.378000 |
| H | 1.039000  | 1.598000  | -2.834000 | H | -0.492000 | 2.601000  | -2.394000 |
| C | 3.582000  | -3.264000 | 0.562000  | C | -2.098000 | -0.220000 | 1.471000  |
| H | 4.376000  | -4.003000 | 0.513000  | H | -2.600000 | 0.732000  | 1.261000  |
| C | 1.452000  | 4.538000  | 0.022000  | H | -2.423000 | -0.536000 | 2.475000  |
| H | 1.776000  | 5.561000  | -0.147000 | C | 3.850000  | -1.741000 | 1.577000  |
| C | -0.277000 | -0.955000 | -2.133000 | C | -4.038000 | -2.895000 | -0.444000 |
| H | 0.133000  | -1.962000 | -1.991000 | H | -4.908000 | -3.536000 | -0.336000 |
| H | -0.315000 | -0.770000 | -3.213000 | C | -0.260000 | 1.341000  | 1.912000  |
| H | 0.705000  | 2.318000  | 2.482000  | H | 0.817000  | 1.320000  | 2.117000  |
| H | 1.435000  | 4.690000  | 2.186000  | H | -0.758000 | 1.583000  | 2.864000  |
| O | -2.749000 | -0.114000 | 1.740000  | H | -1.549000 | -2.033000 | -2.597000 |
| C | -3.926000 | -0.053000 | 2.584000  | H | -3.548000 | -3.555000 | -2.451000 |
| H | -4.644000 | 0.667000  | 2.182000  | H | 4.697000  | -2.147000 | 2.123000  |
| H | -4.374000 | -1.045000 | 2.682000  | H | 4.993000  | -1.330000 | -0.203000 |
| H | -3.559000 | 0.287000  | 3.551000  | O | 2.933000  | -0.243000 | -1.631000 |
| H | -0.268000 | -0.023000 | 2.011000  | C | 4.149000  | -0.269000 | -2.390000 |

**Co<sup>II</sup>-H(6-MeOTPA)**

|    |           |           |           |
|----|-----------|-----------|-----------|
| Co | -0.072000 | 0.005000  | -0.909000 |
| N  | -0.648000 | 0.015000  | 1.408000  |
| C  | 4.022000  | -1.287000 | 0.275000  |
| C  | 1.535000  | -1.143000 | 1.441000  |
| N  | -0.427000 | 2.053000  | -0.409000 |
| N  | -1.807000 | -1.258000 | -0.705000 |
| C  | -0.528000 | 2.425000  | 0.883000  |
| C  | 2.907000  | -0.756000 | -0.396000 |
| C  | 0.128000  | -1.083000 | 2.003000  |
| H  | -0.383000 | -2.022000 | 1.757000  |
| H  | 0.161000  | -1.019000 | 3.102000  |
| N  | 1.686000  | -0.706000 | 0.174000  |
| C  | -0.972000 | 4.700000  | 0.239000  |
| H  | -1.190000 | 5.733000  | 0.496000  |
| C  | 2.592000  | -1.660000 | 2.183000  |
| H  | 2.438000  | -1.992000 | 3.205000  |
| C  | -2.173000 | -2.074000 | -1.709000 |
| C  | -0.808000 | 3.743000  | 1.243000  |
| H  | -0.895000 | 4.015000  | 2.291000  |
| C  | -2.537000 | -1.230000 | 0.427000  |
| C  | -0.857000 | 4.310000  | -1.097000 |

|   |           |           |           |
|---|-----------|-----------|-----------|
| H | -0.980000 | 5.021000  | -1.907000 |
| C | -3.285000 | -2.910000 | -1.620000 |
| C | -3.658000 | -2.043000 | 0.596000  |
| H | -4.223000 | -2.008000 | 1.523000  |
| C | -0.587000 | 2.972000  | -1.378000 |
| H | -0.492000 | 2.601000  | -2.394000 |
| C | -2.098000 | -0.220000 | 1.471000  |
| H | -2.600000 | 0.732000  | 1.261000  |
| H | -2.423000 | -0.536000 | 2.475000  |
| C | 3.850000  | -1.741000 | 1.577000  |
| C | -4.038000 | -2.895000 | -0.444000 |
| H | -4.908000 | -3.536000 | -0.336000 |
| C | -0.260000 | 1.341000  | 1.912000  |
| H | 0.817000  | 1.320000  | 2.117000  |
| H | -0.758000 | 1.583000  | 2.864000  |
| H | -1.549000 | -2.033000 | -2.597000 |
| H | -3.548000 | -3.555000 | -2.451000 |
| H | 4.697000  | -2.147000 | 2.123000  |
| H | 4.993000  | -1.330000 | -0.203000 |
| O | 2.933000  | -0.243000 | -1.631000 |
| C | 4.149000  | -0.269000 | -2.390000 |
| H | 3.892000  | 0.174000  | -3.351000 |
| H | 4.927000  | 0.327000  | -1.900000 |
| H | 4.492000  | -1.299000 | -2.538000 |
| H | 0.100000  | -0.013000 | -2.532000 |

**Co<sup>II</sup>(6-MeOTPA)**

|    |           |           |           |
|----|-----------|-----------|-----------|
| Co | -0.052000 | 0.002000  | -0.595000 |
| N  | -0.629000 | -0.018000 | 1.482000  |
| C  | 4.140000  | -0.457000 | 0.133000  |
| C  | 1.766000  | -0.657000 | 1.550000  |
| N  | -0.822000 | 1.889000  | -0.494000 |
| N  | -1.383000 | -1.541000 | -0.682000 |
| C  | -1.089000 | 2.313000  | 0.768000  |
| C  | 2.894000  | -0.269000 | -0.478000 |
| C  | 0.400000  | -0.824000 | 2.192000  |
| H  | 0.108000  | -1.878000 | 2.117000  |
| H  | 0.435000  | -0.577000 | 3.261000  |
| N  | 1.747000  | -0.373000 | 0.224000  |
| C  | -2.014000 | 4.366000  | -0.082000 |
| H  | -2.484000 | 5.331000  | 0.083000  |
| C  | 2.963000  | -0.840000 | 2.225000  |
| H  | 2.974000  | -1.061000 | 3.287000  |
| C  | -1.519000 | -2.419000 | -1.701000 |

|   |           |           |           |    |           |           |           |
|---|-----------|-----------|-----------|----|-----------|-----------|-----------|
| C | -1.692000 | 3.546000  | 1.002000  | H  | 2.231000  | -0.963000 | -2.820000 |
| H | -1.904000 | 3.863000  | 2.019000  | N  | 1.655000  | -1.627000 | 0.390000  |
| C | -2.124000 | -1.704000 | 0.444000  | C  | -4.082000 | -0.475000 | -1.309000 |
| C | -1.729000 | 3.928000  | -1.378000 | H  | -5.053000 | -0.555000 | -1.779000 |
| H | -1.965000 | 4.535000  | -2.246000 | C  | 3.128000  | -2.834000 | -1.069000 |
| C | -2.403000 | -3.490000 | -1.644000 | H  | 3.619000  | -2.922000 | -2.031000 |
| C | -3.017000 | -2.765000 | 0.572000  | C  | 1.638000  | 2.653000  | 1.357000  |
| H | -3.594000 | -2.882000 | 1.484000  | C  | -2.921000 | -0.644000 | -2.074000 |
| C | -1.137000 | 2.682000  | -1.543000 | H  | -2.998000 | -0.860000 | -3.134000 |
| H | -0.906000 | 2.296000  | -2.532000 | C  | 1.311000  | 2.324000  | -0.951000 |
| C | -1.978000 | -0.636000 | 1.514000  | C  | -3.956000 | -0.201000 | 0.060000  |
| H | -2.713000 | 0.154000  | 1.318000  | C  | 2.235000  | 3.894000  | 1.130000  |
| H | -2.209000 | -1.045000 | 2.506000  | C  | 1.911000  | 3.551000  | -1.240000 |
| C | 4.158000  | -0.741000 | 1.496000  | H  | 2.007000  | 3.880000  | -2.269000 |
| C | -3.163000 | -3.667000 | -0.485000 | C  | -2.667000 | -0.096000 | 0.615000  |
| H | -3.857000 | -4.499000 | -0.403000 | H  | -2.527000 | 0.113000  | 1.668000  |
| C | -0.632000 | 1.407000  | 1.898000  | C  | 0.699000  | 1.437000  | -2.014000 |
| H | 0.397000  | 1.677000  | 2.166000  | H  | -0.356000 | 1.711000  | -2.135000 |
| H | -1.246000 | 1.562000  | 2.794000  | H  | 1.188000  | 1.598000  | -2.985000 |
| H | -0.898000 | -2.249000 | -2.577000 | C  | 3.328000  | -3.798000 | -0.072000 |
| H | -2.485000 | -4.170000 | -2.486000 | H  | 3.977000  | -4.646000 | -0.257000 |
| H | 5.111000  | -0.885000 | 1.998000  | C  | 2.377000  | 4.346000  | -0.186000 |
| H | 5.062000  | -0.378000 | -0.431000 | H  | 2.843000  | 5.303000  | -0.391000 |
| O | 2.668000  | 0.027000  | -1.766000 | C  | -0.368000 | -0.802000 | -2.196000 |
| C | 3.792000  | 0.168000  | -2.674000 | H  | -0.092000 | -1.857000 | -2.079000 |
| H | 3.349000  | 0.397000  | -3.642000 | H  | -0.477000 | -0.615000 | -3.275000 |
| H | 4.435000  | 0.992000  | -2.352000 | Cl | -0.004000 | -0.018000 | 2.942000  |
| H | 4.350000  | -0.770000 | -2.730000 | H  | 1.492000  | 2.244000  | 2.349000  |

### C3

#### Co<sup>II</sup>(5-MeOTPA)Cl (High-spin state)

|    |           |           |           |
|----|-----------|-----------|-----------|
| Co | 0.357000  | -0.006000 | 0.639000  |
| N  | 0.738000  | 0.006000  | -1.608000 |
| C  | 2.681000  | -3.655000 | 1.160000  |
| H  | 2.816000  | -4.380000 | 1.953000  |
| C  | 2.289000  | -1.750000 | -0.806000 |
| N  | -1.566000 | -0.261000 | -0.142000 |
| N  | 1.191000  | 1.886000  | 0.330000  |
| C  | -1.669000 | -0.543000 | -1.471000 |
| C  | 1.846000  | -2.555000 | 1.361000  |
| H  | 1.320000  | -2.379000 | 2.291000  |
| C  | 2.077000  | -0.617000 | -1.787000 |
| H  | 2.827000  | 0.160000  | -1.594000 |

|    |           |           |           |
|----|-----------|-----------|-----------|
| H  | 2.231000  | -0.963000 | -2.820000 |
| N  | 1.655000  | -1.627000 | 0.390000  |
| C  | -4.082000 | -0.475000 | -1.309000 |
| H  | -5.053000 | -0.555000 | -1.779000 |
| C  | 3.128000  | -2.834000 | -1.069000 |
| H  | 3.619000  | -2.922000 | -2.031000 |
| C  | 1.638000  | 2.653000  | 1.357000  |
| C  | -2.921000 | -0.644000 | -2.074000 |
| H  | -2.998000 | -0.860000 | -3.134000 |
| C  | 1.311000  | 2.324000  | -0.951000 |
| C  | -3.956000 | -0.201000 | 0.060000  |
| C  | 2.235000  | 3.894000  | 1.130000  |
| C  | 1.911000  | 3.551000  | -1.240000 |
| H  | 2.007000  | 3.880000  | -2.269000 |
| C  | -2.667000 | -0.096000 | 0.615000  |
| H  | -2.527000 | 0.113000  | 1.668000  |
| C  | 0.699000  | 1.437000  | -2.014000 |
| H  | -0.356000 | 1.711000  | -2.135000 |
| H  | 1.188000  | 1.598000  | -2.985000 |
| C  | 3.328000  | -3.798000 | -0.072000 |
| H  | 3.977000  | -4.646000 | -0.257000 |
| C  | 2.377000  | 4.346000  | -0.186000 |
| H  | 2.843000  | 5.303000  | -0.391000 |
| C  | -0.368000 | -0.802000 | -2.196000 |
| H  | -0.092000 | -1.857000 | -2.079000 |
| H  | -0.477000 | -0.615000 | -3.275000 |
| Cl | -0.004000 | -0.018000 | 2.942000  |
| H  | 1.492000  | 2.244000  | 2.349000  |
| H  | 2.580000  | 4.486000  | 1.968000  |
| O  | -4.989000 | -0.014000 | 0.937000  |
| C  | -6.370000 | -0.122000 | 0.466000  |
| H  | -6.978000 | 0.055000  | 1.351000  |
| H  | -6.582000 | 0.639000  | -0.292000 |
| H  | -6.567000 | -1.123000 | 0.070000  |

#### Co<sup>II</sup>(5-MeOTPA)Cl (Low-spin state)

|    |           |           |           |
|----|-----------|-----------|-----------|
| Co | 0.322000  | -0.262000 | -0.416000 |
| N  | 0.729000  | -0.001000 | 1.540000  |
| C  | 0.844000  | 4.061000  | -1.301000 |
| H  | 0.630000  | 4.747000  | -2.114000 |
| C  | 1.358000  | 2.244000  | 0.688000  |
| N  | -1.610000 | -0.175000 | 0.143000  |
| N  | 2.085000  | -1.231000 | -0.375000 |
| C  | -1.761000 | -0.127000 | 1.491000  |

|                                   |           |           |           |                                 |           |           |           |
|-----------------------------------|-----------|-----------|-----------|---------------------------------|-----------|-----------|-----------|
| C                                 | 0.581000  | 2.699000  | -1.452000 | C                               | 2.380000  | -1.649000 | -0.812000 |
| H                                 | 0.163000  | 2.283000  | -2.364000 | N                               | -1.575000 | -0.239000 | -0.121000 |
| C                                 | 1.688000  | 1.142000  | 1.672000  | N                               | 1.061000  | 1.902000  | 0.308000  |
| H                                 | 2.690000  | 0.761000  | 1.446000  | C                               | -1.668000 | -0.601000 | -1.423000 |
| H                                 | 1.705000  | 1.507000  | 2.707000  | C                               | 2.259000  | -2.285000 | 1.425000  |
| N                                 | 0.834000  | 1.815000  | -0.475000 | H                               | 1.896000  | -2.026000 | 2.416000  |
| C                                 | -4.121000 | -0.585000 | 1.283000  | C                               | 2.071000  | -0.566000 | -1.828000 |
| H                                 | -5.087000 | -0.754000 | 1.745000  | H                               | 2.779000  | 0.257000  | -1.677000 |
| C                                 | 1.635000  | 3.590000  | 0.926000  | H                               | 2.227000  | -0.942000 | -2.854000 |
| H                                 | 2.050000  | 3.910000  | 1.877000  | N                               | 1.965000  | -1.384000 | 0.457000  |
| C                                 | 2.887000  | -1.558000 | -1.403000 | C                               | -4.081000 | -0.644000 | -1.278000 |
| C                                 | -3.000000 | -0.343000 | 2.081000  | H                               | -5.045000 | -0.797000 | -1.749000 |
| H                                 | -3.102000 | -0.316000 | 3.163000  | C                               | 3.083000  | -2.804000 | -1.139000 |
| C                                 | 2.374000  | -1.683000 | 0.869000  | H                               | 3.389000  | -2.976000 | -2.168000 |
| C                                 | -3.960000 | -0.607000 | -0.108000 | C                               | 1.460000  | 2.723000  | 1.304000  |
| C                                 | 4.022000  | -2.348000 | -1.226000 | C                               | -2.906000 | -0.793000 | -2.026000 |
| C                                 | 3.493000  | -2.471000 | 1.121000  | H                               | -2.964000 | -1.068000 | -3.077000 |
| H                                 | 3.706000  | -2.815000 | 2.129000  | C                               | 1.181000  | 2.331000  | -0.970000 |
| C                                 | -2.670000 | -0.412000 | -0.637000 | C                               | -3.967000 | -0.297000 | 0.073000  |
| H                                 | -2.494000 | -0.465000 | -1.706000 | C                               | 2.003000  | 3.982000  | 1.064000  |
| C                                 | 1.373000  | -1.285000 | 1.937000  | C                               | 1.733000  | 3.570000  | -1.289000 |
| H                                 | 0.583000  | -2.042000 | 2.008000  | H                               | 1.828000  | 3.869000  | -2.330000 |
| H                                 | 1.848000  | -1.206000 | 2.925000  | C                               | -2.684000 | -0.100000 | 0.611000  |
| C                                 | 1.374000  | 4.513000  | -0.092000 | H                               | -2.545000 | 0.167000  | 1.656000  |
| H                                 | 1.581000  | 5.568000  | 0.061000  | C                               | 0.611000  | 1.402000  | -2.030000 |
| C                                 | 4.329000  | -2.812000 | 0.054000  | H                               | -0.457000 | 1.628000  | -2.140000 |
| H                                 | 5.207000  | -3.429000 | 0.222000  | H                               | 1.079000  | 1.600000  | -3.009000 |
| C                                 | -0.540000 | 0.282000  | 2.282000  | C                               | 3.393000  | -3.730000 | -0.133000 |
| H                                 | -0.582000 | 1.364000  | 2.450000  | H                               | 3.941000  | -4.638000 | -0.365000 |
| H                                 | -0.519000 | -0.192000 | 3.271000  | C                               | 2.154000  | 4.417000  | -0.257000 |
| Cl                                | -0.061000 | -0.631000 | -2.598000 | H                               | 2.586000  | 5.388000  | -0.481000 |
| H                                 | 2.581000  | -1.183000 | -2.374000 | C                               | -0.359000 | -0.853000 | -2.155000 |
| H                                 | 4.646000  | -2.591000 | -2.079000 | H                               | -0.057000 | -1.897000 | -1.990000 |
| O                                 | -4.933000 | -0.815000 | -1.015000 | H                               | -0.505000 | -0.734000 | -3.244000 |
| C                                 | -6.273000 | -1.034000 | -0.562000 | Cl                              | -0.048000 | -0.081000 | 3.010000  |
| H                                 | -6.866000 | -1.169000 | -1.466000 | H                               | 1.323000  | 2.326000  | 2.306000  |
| H                                 | -6.333000 | -1.937000 | 0.057000  | H                               | 2.308000  | 4.604000  | 1.900000  |
| H                                 | -6.643000 | -0.166000 | -0.004000 | O                               | -5.005000 | -0.118000 | 0.932000  |
|                                   |           |           |           | C                               | -6.329000 | -0.316000 | 0.449000  |
| <b>Co<sup>I</sup>(5-MeOTPA)Cl</b> |           |           |           | H                               | -6.984000 | -0.131000 | 1.301000  |
| Co                                | 0.403000  | -0.040000 | 0.652000  | H                               | -6.568000 | 0.390000  | -0.358000 |
| N                                 | 0.723000  | -0.010000 | -1.641000 | H                               | -6.472000 | -1.345000 | 0.094000  |
| C                                 | 2.969000  | -3.456000 | 1.172000  |                                 |           |           |           |
| H                                 | 3.183000  | -4.139000 | 1.989000  | <b>Co<sup>I</sup>(5-MeOTPA)</b> |           |           |           |



|   |           |           |           |
|---|-----------|-----------|-----------|
| C | 6.268000  | -0.118000 | -0.803000 |
| H | 6.853000  | 0.064000  | -1.703000 |
| H | 6.500000  | 0.640000  | -0.048000 |
| H | 6.471000  | -1.125000 | -0.423000 |
| H | -0.095000 | -0.015000 | -2.140000 |

**Co<sup>II</sup>-H(5-MeOTPA)**

|    |           |           |           |
|----|-----------|-----------|-----------|
| Co | -0.341000 | -0.008000 | -0.992000 |
| N  | -0.722000 | 0.001000  | 1.360000  |
| C  | 3.978000  | -0.200000 | -0.296000 |
| C  | 1.681000  | -0.537000 | 1.213000  |
| N  | -1.200000 | 1.898000  | -0.563000 |
| N  | -1.673000 | -1.634000 | -0.626000 |
| C  | -1.314000 | 2.312000  | 0.716000  |
| C  | 2.685000  | -0.103000 | -0.845000 |
| H  | 2.549000  | 0.108000  | -1.901000 |
| C  | 0.376000  | -0.793000 | 1.939000  |
| H  | 0.110000  | -1.852000 | 1.826000  |
| H  | 0.491000  | -0.610000 | 3.019000  |
| N  | 1.584000  | -0.267000 | -0.108000 |
| C  | -2.404000 | 4.337000  | 0.008000  |
| H  | -2.878000 | 5.287000  | 0.236000  |
| C  | 2.926000  | -0.632000 | 1.827000  |
| H  | 2.995000  | -0.840000 | 2.892000  |
| C  | -1.889000 | -2.566000 | -1.572000 |
| C  | -1.920000 | 3.527000  | 1.038000  |
| H  | -2.009000 | 3.833000  | 2.076000  |
| C  | -2.274000 | -1.755000 | 0.574000  |
| C  | -2.272000 | 3.908000  | -1.314000 |
| H  | -2.634000 | 4.508000  | -2.142000 |
| C  | -2.714000 | -3.667000 | -1.357000 |
| C  | -3.106000 | -2.835000 | 0.869000  |
| H  | -3.571000 | -2.915000 | 1.847000  |
| C  | -1.666000 | 2.677000  | -1.556000 |
| H  | -1.534000 | 2.285000  | -2.560000 |
| C  | -2.042000 | -0.618000 | 1.553000  |
| H  | -2.802000 | 0.152000  | 1.368000  |
| H  | -2.190000 | -0.964000 | 2.588000  |
| C  | 4.093000  | -0.467000 | 1.074000  |
| C  | -3.331000 | -3.804000 | -0.112000 |
| H  | -3.977000 | -4.653000 | 0.095000  |
| C  | -0.686000 | 1.414000  | 1.766000  |
| H  | 0.367000  | 1.701000  | 1.876000  |
| H  | -1.161000 | 1.576000  | 2.746000  |

|   |           |           |           |
|---|-----------|-----------|-----------|
| H | -1.379000 | -2.401000 | -2.518000 |
| H | -2.864000 | -4.397000 | -2.146000 |
| H | 5.061000  | -0.544000 | 1.556000  |
| O | 4.996000  | -0.017000 | -1.159000 |
| C | 6.341000  | -0.112000 | -0.676000 |
| H | 6.974000  | 0.062000  | -1.546000 |
| H | 6.539000  | 0.653000  | 0.083000  |
| H | 6.540000  | -1.111000 | -0.269000 |
| H | -0.090000 | -0.014000 | -2.611000 |

**Co<sup>II</sup>(5-MeOTPA)**

|    |           |           |           |
|----|-----------|-----------|-----------|
| Co | -0.341000 | -0.008000 | -0.992000 |
| N  | -0.722000 | 0.001000  | 1.360000  |
| C  | 3.978000  | -0.200000 | -0.296000 |
| C  | 1.681000  | -0.537000 | 1.213000  |
| N  | -1.200000 | 1.898000  | -0.563000 |
| N  | -1.673000 | -1.634000 | -0.626000 |
| C  | -1.314000 | 2.312000  | 0.716000  |
| C  | 2.685000  | -0.103000 | -0.845000 |
| H  | 2.549000  | 0.108000  | -1.901000 |
| C  | 0.376000  | -0.793000 | 1.939000  |
| H  | 0.110000  | -1.852000 | 1.826000  |
| H  | 0.491000  | -0.610000 | 3.019000  |
| N  | 1.584000  | -0.267000 | -0.108000 |
| C  | -2.404000 | 4.337000  | 0.008000  |
| H  | -2.878000 | 5.287000  | 0.236000  |
| C  | 2.926000  | -0.632000 | 1.827000  |
| H  | 2.995000  | -0.840000 | 2.892000  |
| C  | -1.889000 | -2.566000 | -1.572000 |
| C  | -1.920000 | 3.527000  | 1.038000  |
| H  | -2.009000 | 3.833000  | 2.076000  |
| C  | -2.274000 | -1.755000 | 0.574000  |
| C  | -2.272000 | 3.908000  | -1.314000 |
| H  | -2.634000 | 4.508000  | -2.142000 |
| C  | -2.714000 | -3.667000 | -1.357000 |
| C  | -3.106000 | -2.835000 | 0.869000  |
| H  | -3.571000 | -2.915000 | 1.847000  |
| C  | -1.666000 | 2.677000  | -1.556000 |
| H  | -1.534000 | 2.285000  | -2.560000 |
| C  | -2.042000 | -0.618000 | 1.553000  |
| H  | -2.802000 | 0.152000  | 1.368000  |
| H  | -2.190000 | -0.964000 | 2.588000  |
| C  | 4.093000  | -0.467000 | 1.074000  |
| C  | -3.331000 | -3.804000 | -0.112000 |

|   |           |           |           |    |           |           |           |
|---|-----------|-----------|-----------|----|-----------|-----------|-----------|
| H | -3.977000 | -4.653000 | 0.095000  | H  | 2.178000  | 2.115000  | 2.138000  |
| C | -0.686000 | 1.414000  | 1.766000  | C  | 1.663000  | -0.737000 | -2.007000 |
| H | 0.367000  | 1.701000  | 1.876000  | H  | 2.498000  | -0.026000 | -1.985000 |
| H | -1.161000 | 1.576000  | 2.746000  | H  | 1.572000  | -1.095000 | -3.043000 |
| H | -1.379000 | -2.401000 | -2.518000 | C  | -4.237000 | -0.133000 | -0.302000 |
| H | -2.864000 | -4.397000 | -2.146000 | C  | 2.986000  | -4.007000 | -0.531000 |
| H | 5.061000  | -0.544000 | 1.556000  | H  | 3.514000  | -4.905000 | -0.832000 |
| O | 4.996000  | -0.017000 | -1.159000 | C  | 0.450000  | 1.431000  | -1.969000 |
| C | 6.341000  | -0.112000 | -0.676000 | H  | -0.580000 | 1.798000  | -1.882000 |
| H | 6.974000  | 0.062000  | -1.546000 | H  | 0.749000  | 1.559000  | -3.019000 |
| H | 6.539000  | 0.653000  | 0.083000  | Cl | 0.606000  | 0.011000  | 3.048000  |
| H | 6.540000  | -1.111000 | -0.269000 | H  | 1.630000  | -2.429000 | 2.171000  |
| H | -0.090000 | -0.014000 | -2.611000 | H  | 2.867000  | -4.542000 | 1.566000  |

#### C4

##### Co<sup>II</sup>(4-MeOTPA)Cl (High-spin state)

|    |           |           |           |
|----|-----------|-----------|-----------|
| Co | 0.518000  | 0.000000  | 0.712000  |
| N  | 0.445000  | -0.003000 | -1.569000 |
| C  | -3.818000 | 0.116000  | 1.017000  |
| H  | -4.522000 | 0.302000  | 1.817000  |
| C  | -1.924000 | -0.363000 | -0.942000 |
| N  | 1.442000  | 1.810000  | 0.226000  |
| N  | 1.620000  | -1.708000 | 0.229000  |
| C  | 1.338000  | 2.250000  | -1.056000 |
| C  | -2.454000 | 0.125000  | 1.292000  |
| H  | -2.072000 | 0.310000  | 2.289000  |
| C  | -0.820000 | -0.705000 | -1.920000 |
| H  | -0.621000 | -1.782000 | -1.859000 |
| H  | -1.132000 | -0.491000 | -2.953000 |
| N  | -1.520000 | -0.103000 | 0.336000  |
| C  | 2.712000  | 4.162000  | -0.538000 |
| H  | 3.210000  | 5.076000  | -0.840000 |
| C  | -3.264000 | -0.374000 | -1.294000 |
| H  | -3.586000 | -0.571000 | -2.309000 |
| C  | 1.937000  | -2.647000 | 1.155000  |
| C  | 1.972000  | 3.423000  | -1.469000 |
| H  | 1.886000  | 3.754000  | -2.498000 |
| C  | 1.980000  | -1.883000 | -1.070000 |
| C  | 2.802000  | 3.708000  | 0.783000  |
| H  | 3.363000  | 4.257000  | 1.528000  |
| C  | 2.625000  | -3.810000 | 0.806000  |
| C  | 2.658000  | -3.032000 | -1.482000 |
| H  | 2.929000  | -3.160000 | -2.524000 |
| C  | 2.155000  | 2.522000  | 1.134000  |

|   |           |           |           |
|---|-----------|-----------|-----------|
| O | -5.531000 | -0.164000 | -0.720000 |
| C | -6.621000 | 0.062000  | 0.236000  |
| H | -6.546000 | 1.061000  | 0.674000  |
| H | -7.528000 | -0.020000 | -0.358000 |
| H | -6.611000 | -0.704000 | 1.017000  |

##### Co<sup>II</sup>(4-MeOTPA)Cl (Low-spin state)

|    |           |           |           |
|----|-----------|-----------|-----------|
| Co | -0.432000 | -0.219000 | 0.542000  |
| N  | -0.482000 | -0.157000 | -1.472000 |
| C  | 3.837000  | -0.475000 | 1.021000  |
| H  | 4.529000  | -0.577000 | 1.847000  |
| C  | 1.962000  | -0.195000 | -0.968000 |
| N  | -2.152000 | -1.232000 | 0.284000  |
| N  | -0.992000 | 1.835000  | 0.302000  |
| C  | -2.204000 | -1.812000 | -0.939000 |
| C  | 2.488000  | -0.275000 | 1.291000  |
| H  | 2.113000  | -0.237000 | 2.308000  |
| C  | 0.894000  | 0.089000  | -2.001000 |
| H  | 0.959000  | 1.150000  | -2.268000 |
| H  | 1.061000  | -0.481000 | -2.923000 |
| N  | 1.559000  | -0.132000 | 0.327000  |
| C  | -4.267000 | -2.907000 | -0.382000 |
| H  | -5.094000 | -3.561000 | -0.644000 |
| C  | 3.280000  | -0.415000 | -1.328000 |
| H  | 3.583000  | -0.472000 | -2.369000 |
| C  | -0.943000 | 2.815000  | 1.216000  |
| C  | -3.251000 | -2.651000 | -1.309000 |
| H  | -3.272000 | -3.099000 | -2.298000 |
| C  | -1.298000 | 2.135000  | -0.974000 |
| C  | -4.204000 | -2.309000 | 0.877000  |
| H  | -4.972000 | -2.484000 | 1.623000  |

|                                   |           |           |           |                                 |           |           |           |
|-----------------------------------|-----------|-----------|-----------|---------------------------------|-----------|-----------|-----------|
| C                                 | -1.201000 | 4.146000  | 0.888000  | H                               | -1.805000 | -3.692000 | -2.578000 |
| C                                 | -1.553000 | 3.442000  | -1.389000 | C                               | -2.002000 | 1.870000  | -1.059000 |
| H                                 | -1.788000 | 3.656000  | -2.428000 | C                               | -2.712000 | -3.765000 | 0.698000  |
| C                                 | -3.127000 | -1.477000 | 1.177000  | H                               | -3.257000 | -4.343000 | 1.439000  |
| H                                 | -3.007000 | -1.000000 | 2.144000  | C                               | -2.711000 | 3.751000  | 0.812000  |
| C                                 | -1.417000 | 0.936000  | -1.891000 | C                               | -2.469000 | 3.106000  | -1.491000 |
| H                                 | -2.437000 | 0.544000  | -1.822000 | H                               | -2.548000 | 3.310000  | -2.556000 |
| H                                 | -1.243000 | 1.204000  | -2.941000 | C                               | -2.095000 | -2.576000 | 1.072000  |
| C                                 | 4.252000  | -0.556000 | -0.318000 | H                               | -2.130000 | -2.193000 | 2.088000  |
| C                                 | -1.505000 | 4.464000  | -0.437000 | C                               | -1.648000 | 0.749000  | -2.017000 |
| H                                 | -1.702000 | 5.492000  | -0.728000 | H                               | -2.463000 | 0.016000  | -2.007000 |
| C                                 | -1.028000 | -1.494000 | -1.842000 | H                               | -1.565000 | 1.130000  | -3.049000 |
| H                                 | -0.229000 | -2.230000 | -1.687000 | C                               | 4.243000  | 0.170000  | -0.292000 |
| H                                 | -1.312000 | -1.532000 | -2.903000 | C                               | -2.839000 | 4.074000  | -0.544000 |
| Cl                                | -0.433000 | -0.373000 | 2.786000  | H                               | -3.208000 | 5.046000  | -0.859000 |
| H                                 | -0.694000 | 2.502000  | 2.227000  | C                               | -0.412000 | -1.379000 | -1.983000 |
| H                                 | -1.157000 | 4.912000  | 1.655000  | H                               | 0.621000  | -1.734000 | -1.883000 |
| O                                 | 5.508000  | -0.762000 | -0.731000 | H                               | -0.693000 | -1.518000 | -3.041000 |
| C                                 | 6.556000  | -0.920000 | 0.241000  | Cl                              | -0.560000 | -0.025000 | 3.124000  |
| H                                 | 6.367000  | -1.794000 | 0.873000  | H                               | -2.099000 | 2.201000  | 2.211000  |
| H                                 | 7.465000  | -1.072000 | -0.340000 | H                               | -2.984000 | 4.462000  | 1.587000  |
| H                                 | 6.653000  | -0.017000 | 0.853000  | O                               | 5.530000  | 0.249000  | -0.705000 |
| <b>Co<sup>I</sup>(4-MeOTPA)Cl</b> |           |           |           | C                               | 6.572000  | -0.001000 | 0.239000  |
| Co                                | -0.585000 | 0.025000  | 0.720000  | H                               | 6.509000  | -1.022000 | 0.633000  |
| N                                 | -0.431000 | 0.036000  | -1.590000 | H                               | 7.503000  | 0.122000  | -0.314000 |
| C                                 | 3.834000  | -0.151000 | 1.010000  | H                               | 6.535000  | 0.720000  | 1.064000  |
| H                                 | 4.539000  | -0.362000 | 1.806000  | <b>Co<sup>I</sup>(4-MeOTPA)</b> |           |           |           |
| C                                 | 1.922000  | 0.374000  | -0.898000 | Co                              | 0.469000  | -0.033000 | -0.854000 |
| N                                 | -1.403000 | -1.810000 | 0.200000  | N                               | 0.476000  | -0.090000 | 1.296000  |
| N                                 | -1.873000 | 1.557000  | 0.261000  | C                               | -3.888000 | -0.068000 | -1.227000 |
| C                                 | -1.294000 | -2.230000 | -1.084000 | H                               | -4.613000 | -0.165000 | -2.027000 |
| C                                 | 2.466000  | -0.202000 | 1.277000  | C                               | -1.927000 | 0.203000  | 0.690000  |
| H                                 | 2.085000  | -0.437000 | 2.268000  | N                               | 1.760000  | -1.624000 | -0.615000 |
| C                                 | 0.816000  | 0.745000  | -1.878000 | N                               | 1.547000  | 1.717000  | -0.540000 |
| H                                 | 0.612000  | 1.819000  | -1.770000 | C                               | 1.665000  | -2.159000 | 0.629000  |
| H                                 | 1.162000  | 0.590000  | -2.915000 | C                               | -2.544000 | 0.109000  | -1.540000 |
| N                                 | 1.527000  | 0.042000  | 0.352000  | H                               | -2.232000 | 0.151000  | -2.579000 |
| C                                 | -2.626000 | -4.188000 | -0.633000 | C                               | -0.827000 | 0.460000  | 1.711000  |
| H                                 | -3.108000 | -5.104000 | -0.962000 | H                               | -0.707000 | 1.546000  | 1.802000  |
| C                                 | 3.261000  | 0.435000  | -1.260000 | H                               | -1.134000 | 0.091000  | 2.701000  |
| H                                 | 3.563000  | 0.690000  | -2.271000 | N                               | -1.566000 | 0.243000  | -0.624000 |
| C                                 | -2.226000 | 2.499000  | 1.173000  | C                               | 3.288000  | -3.859000 | 0.093000  |
| C                                 | -1.901000 | -3.400000 | -1.535000 | H                               | 3.882000  | -4.724000 | 0.373000  |



|   |           |           |           |   |           |           |           |
|---|-----------|-----------|-----------|---|-----------|-----------|-----------|
| C | -3.238000 | 0.018000  | 1.094000  | N | -1.437000 | 0.098000  | -0.519000 |
| H | -3.504000 | -0.017000 | 2.146000  | C | 2.741000  | -4.127000 | 0.080000  |
| C | 1.812000  | 2.708000  | -1.413000 | H | 3.250000  | -5.056000 | 0.322000  |
| C | 2.422000  | -3.265000 | 1.014000  | C | -3.170000 | 0.359000  | 1.122000  |
| H | 2.333000  | -3.657000 | 2.024000  | H | -3.482000 | 0.549000  | 2.145000  |
| C | 1.855000  | 1.915000  | 0.765000  | C | 1.874000  | 2.571000  | -1.494000 |
| C | 3.377000  | -3.315000 | -1.190000 | C | 2.061000  | -3.419000 | 1.076000  |
| H | 4.039000  | -3.738000 | -1.939000 | H | 2.032000  | -3.786000 | 2.097000  |
| C | 2.382000  | 3.923000  | -1.038000 | C | 2.041000  | 1.870000  | 0.739000  |
| C | 2.411000  | 3.110000  | 1.221000  | C | 2.763000  | -3.627000 | -1.224000 |
| H | 2.632000  | 3.237000  | 2.277000  | H | 3.280000  | -4.149000 | -2.022000 |
| C | 2.603000  | -2.199000 | -1.496000 | C | 2.598000  | 3.727000  | -1.225000 |
| H | 2.655000  | -1.735000 | -2.477000 | C | 2.758000  | 3.014000  | 1.075000  |
| C | 1.627000  | 0.740000  | 1.704000  | H | 3.093000  | 3.168000  | 2.097000  |
| H | 2.519000  | 0.104000  | 1.670000  | C | 2.107000  | -2.431000 | -1.493000 |
| H | 1.530000  | 1.092000  | 2.742000  | H | 2.098000  | -1.995000 | -2.486000 |
| C | -4.253000 | -0.119000 | 0.127000  | C | 1.755000  | 0.753000  | 1.719000  |
| C | 2.684000  | 4.132000  | 0.308000  | H | 2.599000  | 0.053000  | 1.714000  |
| H | 3.120000  | 5.069000  | 0.642000  | H | 1.657000  | 1.131000  | 2.745000  |
| C | 0.655000  | -1.524000 | 1.578000  | C | -4.160000 | 0.133000  | 0.133000  |
| H | -0.319000 | -2.009000 | 1.429000  | C | 3.044000  | 3.953000  | 0.079000  |
| H | 0.948000  | -1.713000 | 2.623000  | H | 3.605000  | 4.851000  | 0.322000  |
| H | 1.549000  | 2.513000  | -2.449000 | C | 0.586000  | -1.433000 | 1.721000  |
| H | 2.575000  | 4.685000  | -1.787000 | H | -0.441000 | -1.818000 | 1.717000  |
| O | -5.498000 | -0.292000 | 0.592000  | H | 0.964000  | -1.535000 | 2.746000  |
| C | -6.584000 | -0.440000 | -0.335000 | H | 1.497000  | 2.352000  | -2.487000 |
| H | -6.441000 | -1.327000 | -0.961000 | H | 2.800000  | 4.434000  | -2.023000 |
| H | -7.474000 | -0.563000 | 0.282000  | O | -5.413000 | 0.166000  | 0.547000  |
| H | -6.686000 | 0.455000  | -0.958000 | C | -6.507000 | -0.049000 | -0.378000 |

**Co<sup>III</sup>-H(4-MeOTPA)**

|    |           |           |           |
|----|-----------|-----------|-----------|
| Co | 0.513000  | 0.003000  | -0.758000 |
| N  | 0.536000  | -0.001000 | 1.308000  |
| C  | -3.737000 | -0.110000 | -1.192000 |
| H  | -4.441000 | -0.289000 | -1.996000 |
| C  | -1.841000 | 0.346000  | 0.766000  |
| N  | 1.447000  | -1.750000 | -0.530000 |
| N  | 1.604000  | 1.661000  | -0.531000 |
| C  | 1.415000  | -2.233000 | 0.740000  |
| C  | -2.382000 | -0.122000 | -1.466000 |
| H  | -2.022000 | -0.313000 | -2.470000 |
| C  | -0.725000 | 0.673000  | 1.734000  |
| H  | -0.546000 | 1.754000  | 1.718000  |
| H  | -0.989000 | 0.402000  | 2.764000  |

|   |           |           |           |
|---|-----------|-----------|-----------|
| N | -1.437000 | 0.098000  | -0.519000 |
| C | 2.741000  | -4.127000 | 0.080000  |
| H | 3.250000  | -5.056000 | 0.322000  |
| C | -3.170000 | 0.359000  | 1.122000  |
| H | -3.482000 | 0.549000  | 2.145000  |
| C | 1.874000  | 2.571000  | -1.494000 |
| C | 2.061000  | -3.419000 | 1.076000  |
| H | 2.032000  | -3.786000 | 2.097000  |
| C | 2.041000  | 1.870000  | 0.739000  |
| C | 2.763000  | -3.627000 | -1.224000 |
| H | 3.280000  | -4.149000 | -2.022000 |
| C | 2.598000  | 3.727000  | -1.225000 |
| C | 2.758000  | 3.014000  | 1.075000  |
| H | 3.093000  | 3.168000  | 2.097000  |
| C | 2.107000  | -2.431000 | -1.493000 |
| H | 2.098000  | -1.995000 | -2.486000 |
| C | 1.755000  | 0.753000  | 1.719000  |
| H | 2.599000  | 0.053000  | 1.714000  |
| H | 1.657000  | 1.131000  | 2.745000  |
| C | -4.160000 | 0.133000  | 0.133000  |
| C | 3.044000  | 3.953000  | 0.079000  |
| H | 3.605000  | 4.851000  | 0.322000  |
| C | 0.586000  | -1.433000 | 1.721000  |
| H | -0.441000 | -1.818000 | 1.717000  |
| H | 0.964000  | -1.535000 | 2.746000  |
| H | 1.497000  | 2.352000  | -2.487000 |
| H | 2.800000  | 4.434000  | -2.023000 |
| O | -5.413000 | 0.166000  | 0.547000  |
| C | -6.507000 | -0.049000 | -0.378000 |
| H | -6.439000 | -1.049000 | -0.817000 |
| H | -7.407000 | 0.032000  | 0.229000  |
| H | -6.504000 | 0.724000  | -1.151000 |
| H | 0.488000  | 0.001000  | -2.259000 |

**Co<sup>I</sup>-H(4-MeOTPA)**

|    |           |           |           |
|----|-----------|-----------|-----------|
| Co | -0.549000 | 0.000000  | -1.095000 |
| N  | -0.519000 | -0.000000 | 1.292000  |
| C  | 3.823000  | 0.094000  | -1.152000 |
| H  | 4.551000  | 0.278000  | -1.932000 |
| C  | 1.856000  | -0.368000 | 0.721000  |
| N  | -1.470000 | 1.835000  | -0.510000 |
| N  | -1.679000 | -1.715000 | -0.512000 |
| C  | -1.390000 | 2.253000  | 0.770000  |
| C  | 2.468000  | 0.098000  | -1.466000 |

|                                  |           |           |           |                                                     |           |           |           |
|----------------------------------|-----------|-----------|-----------|-----------------------------------------------------|-----------|-----------|-----------|
| H                                | 2.129000  | 0.281000  | -2.482000 | N                                                   | -1.657000 | -1.679000 | -0.561000 |
| C                                | 0.718000  | -0.703000 | 1.668000  | C                                                   | -1.402000 | 2.247000  | 0.724000  |
| H                                | 0.522000  | -1.780000 | 1.597000  | C                                                   | 2.428000  | 0.090000  | -1.495000 |
| H                                | 1.009000  | -0.500000 | 2.710000  | H                                                   | 2.093000  | 0.278000  | -2.511000 |
| N                                | 1.499000  | -0.123000 | -0.562000 | C                                                   | 0.726000  | -0.678000 | 1.700000  |
| C                                | -2.741000 | 4.180000  | 0.270000  | H                                                   | 0.544000  | -1.759000 | 1.680000  |
| H                                | -3.240000 | 5.093000  | 0.580000  | H                                                   | 1.017000  | -0.421000 | 2.727000  |
| C                                | 3.178000  | -0.377000 | 1.130000  | N                                                   | 1.462000  | -0.123000 | -0.569000 |
| H                                | 3.451000  | -0.566000 | 2.164000  | C                                                   | -2.708000 | 4.179000  | 0.122000  |
| C                                | -1.989000 | -2.665000 | -1.413000 | H                                                   | -3.205000 | 5.106000  | 0.393000  |
| C                                | -2.022000 | 3.421000  | 1.196000  | C                                                   | 3.168000  | -0.369000 | 1.102000  |
| H                                | -1.950000 | 3.732000  | 2.235000  | H                                                   | 3.461000  | -0.548000 | 2.132000  |
| C                                | -2.049000 | -1.873000 | 0.775000  | C                                                   | -1.960000 | -2.604000 | -1.501000 |
| C                                | -2.812000 | 3.746000  | -1.055000 | C                                                   | -2.035000 | 3.432000  | 1.093000  |
| H                                | -3.360000 | 4.307000  | -1.806000 | H                                                   | -1.999000 | 3.769000  | 2.125000  |
| C                                | -2.682000 | -3.823000 | -1.064000 | C                                                   | -2.059000 | -1.873000 | 0.721000  |
| C                                | -2.733000 | -3.012000 | 1.203000  | C                                                   | -2.740000 | 3.716000  | -1.196000 |
| H                                | -3.010000 | -3.121000 | 2.247000  | H                                                   | -3.255000 | 4.265000  | -1.977000 |
| C                                | -2.162000 | 2.564000  | -1.403000 | C                                                   | -2.681000 | -3.754000 | -1.203000 |
| H                                | -2.179000 | 2.171000  | -2.416000 | C                                                   | -2.771000 | -3.011000 | 1.090000  |
| C                                | -1.735000 | -0.717000 | 1.707000  | H                                                   | -3.075000 | -3.152000 | 2.123000  |
| H                                | -2.571000 | -0.008000 | 1.665000  | C                                                   | -2.100000 | 2.519000  | -1.495000 |
| H                                | -1.672000 | -1.070000 | 2.749000  | H                                                   | -2.107000 | 2.116000  | -2.503000 |
| C                                | 4.194000  | -0.145000 | 0.182000  | C                                                   | -1.752000 | -0.758000 | 1.706000  |
| C                                | -3.056000 | -3.999000 | 0.269000  | H                                                   | -2.595000 | -0.056000 | 1.710000  |
| H                                | -3.590000 | -4.892000 | 0.580000  | H                                                   | -1.661000 | -1.153000 | 2.726000  |
| C                                | -0.524000 | 1.415000  | 1.693000  | C                                                   | 4.177000  | -0.154000 | 0.132000  |
| H                                | 0.507000  | 1.784000  | 1.627000  | C                                                   | -3.091000 | -3.962000 | 0.116000  |
| H                                | -0.839000 | 1.547000  | 2.740000  | H                                                   | -3.649000 | -4.854000 | 0.386000  |
| H                                | -1.667000 | -2.468000 | -2.431000 | C                                                   | -0.584000 | 1.427000  | 1.705000  |
| H                                | -2.914000 | -4.565000 | -1.820000 | H                                                   | 0.445000  | 1.807000  | 1.705000  |
| O                                | 5.452000  | -0.172000 | 0.642000  | H                                                   | -0.967000 | 1.547000  | 2.727000  |
| C                                | 6.543000  | 0.053000  | -0.264000 | H                                                   | -1.610000 | -2.406000 | -2.510000 |
| H                                | 6.475000  | 1.050000  | -0.711000 | H                                                   | -2.907000 | -4.469000 | -1.986000 |
| H                                | 7.443000  | -0.018000 | 0.347000  | O                                                   | 5.424000  | -0.187000 | 0.569000  |
| H                                | 6.563000  | -0.716000 | -1.044000 | C                                                   | 6.533000  | 0.017000  | -0.339000 |
| H                                | -0.585000 | 0.006000  | -2.735000 | H                                                   | 6.476000  | 1.013000  | -0.787000 |
| <b>Co<sup>II</sup>(4-MeOTPA)</b> |           |           |           | H                                                   | 7.423000  | -0.062000 | 0.284000  |
| Co                               | -0.529000 | -0.003000 | -0.824000 | H                                                   | 6.541000  | -0.763000 | -1.106000 |
| N                                | -0.538000 | -0.002000 | 1.308000  | <b>C5</b>                                           |           |           |           |
| C                                | 3.780000  | 0.078000  | -1.203000 | <b>Co<sup>II</sup>(4-MeTPA)Cl (High-spin state)</b> |           |           |           |
| H                                | 4.497000  | 0.252000  | -1.996000 | Co                                                  | 0.292000  | -0.000000 | 0.719000  |
| C                                | 1.844000  | -0.357000 | 0.723000  |                                                     |           |           |           |
| N                                | -1.442000 | 1.800000  | -0.558000 |                                                     |           |           |           |

|    |           |           |           |                                                    |           |           |           |
|----|-----------|-----------|-----------|----------------------------------------------------|-----------|-----------|-----------|
| Cl | 0.457000  | 0.001000  | 3.047000  |                                                    |           |           |           |
| N  | -1.765000 | -0.042000 | 0.403000  |                                                    |           |           |           |
| N  | 0.144000  | 0.001000  | -1.558000 |                                                    |           |           |           |
| N  | 1.324000  | -1.742000 | 0.200000  |                                                    |           |           |           |
| N  | 1.250000  | 1.784000  | 0.204000  |                                                    |           |           |           |
| C  | 2.010000  | 2.475000  | 1.090000  |                                                    |           |           |           |
| H  | 2.053000  | 2.067000  | 2.093000  |                                                    |           |           |           |
| C  | 2.679000  | 3.642000  | 0.718000  |                                                    |           |           |           |
| H  | 3.278000  | 4.174000  | 1.445000  |                                                    |           |           |           |
| C  | 2.562000  | 4.098000  | -0.600000 |                                                    |           |           |           |
| H  | 3.076000  | 4.998000  | -0.917000 |                                                    |           |           |           |
| C  | 1.773000  | 3.381000  | -1.507000 |                                                    |           |           |           |
| H  | 1.664000  | 3.715000  | -2.533000 |                                                    |           |           |           |
| C  | 1.118000  | 2.227000  | -1.074000 |                                                    |           |           |           |
| C  | 0.178000  | 1.434000  | -1.957000 |                                                    |           |           |           |
| H  | 0.446000  | 1.555000  | -3.017000 |                                                    |           |           |           |
| H  | -0.837000 | 1.830000  | -1.836000 |                                                    |           |           |           |
| C  | 1.327000  | -0.767000 | -2.034000 |                                                    |           |           |           |
| H  | 2.182000  | -0.080000 | -2.036000 |                                                    |           |           |           |
| H  | 1.195000  | -1.119000 | -3.067000 |                                                    |           |           |           |
| C  | 1.639000  | -1.924000 | -1.109000 |                                                    |           |           |           |
| C  | 2.270000  | -3.092000 | -1.543000 |                                                    |           |           |           |
| H  | 2.506000  | -3.225000 | -2.592000 |                                                    |           |           |           |
| C  | 2.597000  | -4.078000 | -0.604000 |                                                    |           |           |           |
| H  | 3.089000  | -4.990000 | -0.921000 |                                                    |           |           |           |
| C  | 2.282000  | -3.874000 | 0.744000  |                                                    |           |           |           |
| H  | 2.524000  | -4.614000 | 1.496000  |                                                    |           |           |           |
| C  | 1.640000  | -2.692000 | 1.116000  |                                                    |           |           |           |
| H  | 1.370000  | -2.466000 | 2.140000  |                                                    |           |           |           |
| C  | -1.151000 | -0.664000 | -1.870000 |                                                    |           |           |           |
| H  | -0.979000 | -1.747000 | -1.827000 |                                                    |           |           |           |
| H  | -1.491000 | -0.432000 | -2.889000 |                                                    |           |           |           |
| C  | -2.212000 | -0.300000 | -0.853000 |                                                    |           |           |           |
| C  | -3.573000 | -0.288000 | -1.155000 |                                                    |           |           |           |
| H  | -3.901000 | -0.489000 | -2.169000 |                                                    |           |           |           |
| C  | -4.519000 | -0.023000 | -0.148000 |                                                    |           |           |           |
| C  | -4.031000 | 0.228000  | 1.148000  |                                                    |           |           |           |
| H  | -4.715000 | 0.435000  | 1.963000  |                                                    |           |           |           |
| C  | -2.661000 | 0.215000  | 1.392000  |                                                    |           |           |           |
| H  | -2.241000 | 0.399000  | 2.373000  |                                                    |           |           |           |
| C  | -5.996000 | -0.004000 | -0.442000 |                                                    |           |           |           |
| H  | -6.530000 | -0.720000 | 0.194000  |                                                    |           |           |           |
| H  | -6.205000 | -0.254000 | -1.484000 |                                                    |           |           |           |
| H  | -6.423000 | 0.985000  | -0.237000 |                                                    |           |           |           |
|    |           |           |           | <b>Co<sup>II</sup>(4-MeTPA)Cl (Low-spin state)</b> |           |           |           |
|    |           |           |           | Co                                                 | 0.174000  | -0.274000 | 0.546000  |
|    |           |           |           | Cl                                                 | 0.224000  | -0.437000 | 2.786000  |
|    |           |           |           | N                                                  | -1.826000 | -0.285000 | 0.405000  |
|    |           |           |           | N                                                  | 0.047000  | -0.167000 | -1.465000 |
|    |           |           |           | N                                                  | 1.950000  | -1.153000 | 0.220000  |
|    |           |           |           | N                                                  | 0.733000  | 1.782000  | 0.299000  |
|    |           |           |           | C                                                  | 1.325000  | 2.589000  | 1.192000  |
|    |           |           |           | H                                                  | 1.438000  | 2.180000  | 2.192000  |
|    |           |           |           | C                                                  | 1.761000  | 3.872000  | 0.855000  |
|    |           |           |           | H                                                  | 2.233000  | 4.499000  | 1.605000  |
|    |           |           |           | C                                                  | 1.583000  | 4.318000  | -0.455000 |
|    |           |           |           | H                                                  | 1.919000  | 5.307000  | -0.753000 |
|    |           |           |           | C                                                  | 0.965000  | 3.475000  | -1.384000 |
|    |           |           |           | H                                                  | 0.807000  | 3.795000  | -2.410000 |
|    |           |           |           | C                                                  | 0.546000  | 2.214000  | -0.961000 |
|    |           |           |           | C                                                  | -0.226000 | 1.257000  | -1.845000 |
|    |           |           |           | H                                                  | -0.010000 | 1.416000  | -2.909000 |
|    |           |           |           | H                                                  | -1.296000 | 1.438000  | -1.701000 |
|    |           |           |           | C                                                  | 1.323000  | -0.647000 | -2.079000 |
|    |           |           |           | H                                                  | 1.876000  | 0.231000  | -2.433000 |
|    |           |           |           | H                                                  | 1.115000  | -1.263000 | -2.963000 |
|    |           |           |           | C                                                  | 2.201000  | -1.382000 | -1.090000 |
|    |           |           |           | C                                                  | 3.259000  | -2.188000 | -1.507000 |
|    |           |           |           | H                                                  | 3.426000  | -2.364000 | -2.566000 |
|    |           |           |           | C                                                  | 4.099000  | -2.753000 | -0.546000 |
|    |           |           |           | H                                                  | 4.932000  | -3.382000 | -0.847000 |
|    |           |           |           | C                                                  | 3.848000  | -2.498000 | 0.803000  |
|    |           |           |           | H                                                  | 4.474000  | -2.917000 | 1.584000  |
|    |           |           |           | C                                                  | 2.758000  | -1.704000 | 1.148000  |
|    |           |           |           | H                                                  | 2.491000  | -1.496000 | 2.179000  |
|    |           |           |           | C                                                  | -1.124000 | -1.033000 | -1.784000 |
|    |           |           |           | H                                                  | -0.803000 | -2.076000 | -1.669000 |
|    |           |           |           | H                                                  | -1.451000 | -0.899000 | -2.825000 |
|    |           |           |           | C                                                  | -2.241000 | -0.728000 | -0.804000 |
|    |           |           |           | C                                                  | -3.587000 | -0.913000 | -1.101000 |
|    |           |           |           | H                                                  | -3.881000 | -1.261000 | -2.088000 |
|    |           |           |           | C                                                  | -4.561000 | -0.651000 | -0.123000 |
|    |           |           |           | C                                                  | -4.107000 | -0.195000 | 1.123000  |
|    |           |           |           | H                                                  | -4.810000 | 0.028000  | 1.921000  |
|    |           |           |           | C                                                  | -2.746000 | -0.027000 | 1.353000  |
|    |           |           |           | H                                                  | -2.354000 | 0.303000  | 2.309000  |
|    |           |           |           | C                                                  | -6.026000 | -0.867000 | -0.393000 |

|   |           |           |           |
|---|-----------|-----------|-----------|
| H | -6.368000 | -1.794000 | 0.085000  |
| H | -6.234000 | -0.947000 | -1.464000 |
| H | -6.629000 | -0.050000 | 0.018000  |

**Co<sup>I</sup>(4-MeTPA)Cl**

|    |           |           |           |
|----|-----------|-----------|-----------|
| Co | -0.349000 | 0.025000  | 0.723000  |
| Cl | -0.430000 | -0.019000 | 3.124000  |
| N  | 1.757000  | -0.035000 | 0.415000  |
| N  | -0.137000 | 0.038000  | -1.583000 |
| N  | -1.599000 | 1.591000  | 0.228000  |
| N  | -1.181000 | -1.800000 | 0.175000  |
| C  | -1.911000 | -2.553000 | 1.027000  |
| H  | -1.959000 | -2.174000 | 2.045000  |
| C  | -2.550000 | -3.724000 | 0.632000  |
| H  | -3.125000 | -4.293000 | 1.357000  |
| C  | -2.445000 | -4.140000 | -0.700000 |
| H  | -2.942000 | -5.042000 | -1.045000 |
| C  | -1.682000 | -3.365000 | -1.581000 |
| H  | -1.571000 | -3.653000 | -2.624000 |
| C  | -1.057000 | -2.213000 | -1.108000 |
| C  | -0.136000 | -1.376000 | -1.982000 |
| H  | -0.393000 | -1.505000 | -3.047000 |
| H  | 0.887000  | -1.752000 | -1.856000 |
| C  | -1.322000 | 0.779000  | -2.044000 |
| H  | -2.155000 | 0.066000  | -2.061000 |
| H  | -1.201000 | 1.160000  | -3.072000 |
| C  | -1.679000 | 1.907000  | -1.095000 |
| C  | -2.102000 | 3.155000  | -1.538000 |
| H  | -2.145000 | 3.362000  | -2.605000 |
| C  | -2.476000 | 4.129000  | -0.601000 |
| H  | -2.811000 | 5.110000  | -0.925000 |
| C  | -2.396000 | 3.804000  | 0.758000  |
| H  | -2.673000 | 4.521000  | 1.526000  |
| C  | -1.953000 | 2.538000  | 1.131000  |
| H  | -1.863000 | 2.235000  | 2.171000  |
| C  | 1.136000  | 0.720000  | -1.824000 |
| H  | 0.950000  | 1.798000  | -1.722000 |
| H  | 1.513000  | 0.560000  | -2.850000 |
| C  | 2.198000  | 0.321000  | -0.809000 |
| C  | 3.559000  | 0.384000  | -1.114000 |
| H  | 3.872000  | 0.661000  | -2.118000 |
| C  | 4.514000  | 0.100000  | -0.130000 |
| C  | 4.035000  | -0.245000 | 1.144000  |
| H  | 4.723000  | -0.474000 | 1.953000  |

|   |          |           |           |
|---|----------|-----------|-----------|
| C | 2.665000 | -0.301000 | 1.374000  |
| H | 2.245000 | -0.554000 | 2.344000  |
| C | 5.993000 | 0.167000  | -0.419000 |
| H | 6.475000 | 0.947000  | 0.184000  |
| H | 6.189000 | 0.388000  | -1.473000 |
| H | 6.487000 | -0.781000 | -0.172000 |

**Co<sup>I</sup>(4-MeTPA)**

|    |           |           |           |
|----|-----------|-----------|-----------|
| Co | 0.235000  | -0.050000 | -0.867000 |
| N  | -1.816000 | 0.034000  | -0.688000 |
| N  | 0.195000  | -0.118000 | 1.283000  |
| N  | 1.068000  | 1.826000  | -0.514000 |
| N  | 1.690000  | -1.487000 | -0.599000 |
| C  | 2.610000  | -1.963000 | -1.463000 |
| H  | 2.638000  | -1.485000 | -2.438000 |
| C  | 3.486000  | -2.997000 | -1.146000 |
| H  | 4.206000  | -3.342000 | -1.881000 |
| C  | 3.419000  | -3.561000 | 0.129000  |
| H  | 4.091000  | -4.364000 | 0.417000  |
| C  | 2.475000  | -3.069000 | 1.033000  |
| H  | 2.401000  | -3.480000 | 2.036000  |
| C  | 1.618000  | -2.042000 | 0.637000  |
| C  | 0.526000  | -1.524000 | 1.567000  |
| H  | 0.819000  | -1.682000 | 2.617000  |
| H  | -0.385000 | -2.114000 | 1.401000  |
| C  | 1.239000  | 0.832000  | 1.716000  |
| H  | 2.198000  | 0.303000  | 1.682000  |
| H  | 1.092000  | 1.154000  | 2.758000  |
| C  | 1.336000  | 2.040000  | 0.797000  |
| C  | 1.742000  | 3.285000  | 1.275000  |
| H  | 1.935000  | 3.421000  | 2.336000  |
| C  | 1.902000  | 4.346000  | 0.379000  |
| H  | 2.220000  | 5.322000  | 0.732000  |
| C  | 1.640000  | 4.123000  | -0.973000 |
| H  | 1.748000  | 4.913000  | -1.708000 |
| C  | 1.220000  | 2.855000  | -1.371000 |
| H  | 0.992000  | 2.646000  | -2.412000 |
| C  | -1.170000 | 0.285000  | 1.668000  |
| H  | -1.163000 | 1.374000  | 1.792000  |
| H  | -1.466000 | -0.142000 | 2.638000  |
| C  | -2.211000 | -0.049000 | 0.607000  |
| C  | -3.526000 | -0.344000 | 0.961000  |
| H  | -3.795000 | -0.406000 | 2.013000  |
| C  | -4.501000 | -0.554000 | -0.025000 |

|   |           |           |           |   |           |           |           |
|---|-----------|-----------|-----------|---|-----------|-----------|-----------|
| C | -4.079000 | -0.457000 | -1.359000 | H | -3.816000 | 0.474000  | 1.986000  |
| H | -4.779000 | -0.607000 | -2.177000 | C | -4.443000 | 0.021000  | -0.037000 |
| C | -2.749000 | -0.170000 | -1.642000 | C | -3.953000 | -0.231000 | -1.332000 |
| H | -2.404000 | -0.093000 | -2.669000 | H | -4.635000 | -0.436000 | -2.152000 |
| C | -5.931000 | -0.870000 | 0.326000  | C | -2.590000 | -0.224000 | -1.574000 |
| H | -6.606000 | -0.098000 | -0.065000 | H | -2.187000 | -0.422000 | -2.561000 |
| H | -6.078000 | -0.933000 | 1.407000  | C | -5.916000 | 0.013000  | 0.253000  |
| H | -6.242000 | -1.823000 | -0.118000 | H | -6.429000 | 0.770000  | -0.353000 |

**Co<sup>III</sup>-H(4-MeTPA)**

|    |           |           |           |
|----|-----------|-----------|-----------|
| Co | 0.284000  | 0.001000  | -0.773000 |
| N  | -1.689000 | 0.029000  | -0.593000 |
| N  | 0.229000  | -0.001000 | 1.292000  |
| N  | 1.300000  | 1.697000  | -0.508000 |
| N  | 1.253000  | -1.723000 | -0.510000 |
| C  | 1.963000  | -2.387000 | -1.450000 |
| H  | 1.977000  | -1.952000 | -2.443000 |
| C  | 2.641000  | -3.565000 | -1.158000 |
| H  | 3.199000  | -4.073000 | -1.937000 |
| C  | 2.590000  | -4.065000 | 0.145000  |
| H  | 3.114000  | -4.980000 | 0.405000  |
| C  | 1.858000  | -3.375000 | 1.117000  |
| H  | 1.804000  | -3.743000 | 2.138000  |
| C  | 1.192000  | -2.207000 | 0.759000  |
| C  | 0.308000  | -1.431000 | 1.710000  |
| H  | 0.654000  | -1.519000 | 2.748000  |
| H  | -0.706000 | -1.846000 | 1.673000  |
| C  | 1.410000  | 0.790000  | 1.745000  |
| H  | 2.276000  | 0.117000  | 1.763000  |
| H  | 1.268000  | 1.161000  | 2.768000  |
| C  | 1.689000  | 1.919000  | 0.776000  |
| C  | 2.353000  | 3.087000  | 1.137000  |
| H  | 2.648000  | 3.251000  | 2.169000  |
| C  | 2.636000  | 4.039000  | 0.151000  |
| H  | 3.156000  | 4.956000  | 0.412000  |
| C  | 2.241000  | 3.799000  | -1.167000 |
| H  | 2.444000  | 4.514000  | -1.958000 |
| C  | 1.569000  | 2.618000  | -1.461000 |
| H  | 1.233000  | 2.388000  | -2.466000 |
| C  | -1.066000 | 0.634000  | 1.674000  |
| H  | -0.918000 | 1.721000  | 1.673000  |
| H  | -1.358000 | 0.350000  | 2.693000  |
| C  | -2.137000 | 0.282000  | 0.665000  |
| C  | -3.492000 | 0.276000  | 0.968000  |

|   |           |           |           |
|---|-----------|-----------|-----------|
| H | -6.128000 | 0.213000  | 1.306000  |
| H | -6.356000 | -0.956000 | -0.012000 |
| H | 0.318000  | 0.001000  | -2.275000 |

**Co<sup>II</sup>-H(4-MeTPA)**

|    |           |           |           |
|----|-----------|-----------|-----------|
| Co | -0.312000 | -0.000000 | -1.103000 |
| N  | -0.216000 | 0.002000  | 1.281000  |
| C  | 4.051000  | 0.215000  | -1.271000 |
| H  | 4.764000  | 0.420000  | -2.064000 |
| C  | 2.153000  | -0.298000 | 0.641000  |
| N  | -1.277000 | 1.802000  | -0.495000 |
| N  | -1.365000 | -1.752000 | -0.491000 |
| C  | -1.176000 | 2.224000  | 0.782000  |
| C  | 2.692000  | 0.196000  | -1.559000 |
| H  | 2.314000  | 0.378000  | -2.562000 |
| C  | 1.055000  | -0.657000 | 1.626000  |
| H  | 0.891000  | -1.741000 | 1.576000  |
| H  | 1.370000  | -0.432000 | 2.656000  |
| N  | 1.757000  | -0.053000 | -0.623000 |
| C  | -2.604000 | 4.104000  | 0.319000  |
| H  | -3.125000 | 5.001000  | 0.643000  |
| C  | 3.499000  | -0.283000 | 1.005000  |
| H  | 3.780000  | -0.476000 | 2.037000  |
| C  | -1.667000 | -2.712000 | -1.383000 |
| C  | -1.835000 | 3.371000  | 1.226000  |
| H  | -1.746000 | 3.684000  | 2.262000  |
| C  | -1.695000 | -1.922000 | 0.805000  |
| C  | -2.696000 | 3.668000  | -1.003000 |
| H  | -3.282000 | 4.209000  | -1.739000 |
| C  | -2.311000 | -3.893000 | -1.016000 |
| C  | -2.330000 | -3.082000 | 1.251000  |
| H  | -2.576000 | -3.199000 | 2.303000  |
| C  | -2.017000 | 2.507000  | -1.369000 |
| H  | -2.047000 | 2.114000  | -2.381000 |
| C  | -1.396000 | -0.755000 | 1.729000  |
| H  | -2.255000 | -0.073000 | 1.708000  |

|                                 |           |           |           |   |           |           |           |
|---------------------------------|-----------|-----------|-----------|---|-----------|-----------|-----------|
| H                               | -1.294000 | -1.103000 | 2.769000  | H | -3.082000 | 5.023000  | 0.468000  |
| C                               | 4.486000  | -0.025000 | 0.042000  | C | 3.493000  | -0.287000 | 0.959000  |
| C                               | -2.644000 | -4.080000 | 0.326000  | H | 3.795000  | -0.474000 | 1.986000  |
| H                               | -3.140000 | -4.990000 | 0.651000  | C | -1.646000 | -2.652000 | -1.469000 |
| C                               | -0.256000 | 1.417000  | 1.681000  | C | -1.840000 | 3.385000  | 1.130000  |
| H                               | 0.759000  | 1.821000  | 1.584000  | H | -1.782000 | 3.723000  | 2.160000  |
| H                               | -0.545000 | 1.540000  | 2.737000  | C | -1.703000 | -1.923000 | 0.755000  |
| H                               | -1.379000 | -2.506000 | -2.410000 | C | -2.626000 | 3.646000  | -1.136000 |
| H                               | -2.538000 | -4.643000 | -1.766000 | H | -3.181000 | 4.179000  | -1.900000 |
| H                               | -0.390000 | -0.000000 | -2.741000 | C | -2.316000 | -3.827000 | -1.149000 |
| C                               | 5.950000  | 0.001000  | 0.396000  | C | -2.363000 | -3.085000 | 1.146000  |
| H                               | 6.373000  | 0.998000  | 0.223000  | H | -2.631000 | -3.235000 | 2.187000  |
| H                               | 6.119000  | -0.262000 | 1.444000  | C | -1.959000 | 2.470000  | -1.456000 |
| H                               | 6.514000  | -0.701000 | -0.229000 | H | -1.986000 | 2.066000  | -2.464000 |
| <b>Co<sup>II</sup>(4-MeTPA)</b> |           |           |           | C | -1.407000 | -0.795000 | 1.728000  |
| Co                              | -0.294000 | -0.001000 | -0.838000 | H | -2.272000 | -0.121000 | 1.754000  |
| N                               | -0.229000 | -0.002000 | 1.293000  | H | -1.275000 | -1.183000 | 2.747000  |
| C                               | 4.003000  | 0.194000  | -1.334000 | C | 4.465000  | -0.046000 | -0.026000 |
| H                               | 4.701000  | 0.390000  | -2.143000 | C | -2.677000 | -4.048000 | 0.183000  |
| C                               | 2.142000  | -0.293000 | 0.631000  | H | -3.194000 | -4.959000 | 0.469000  |
| N                               | -1.250000 | 1.771000  | -0.540000 | C | -0.309000 | 1.426000  | 1.694000  |
| N                               | -1.348000 | -1.717000 | -0.539000 | H | 0.707000  | 1.839000  | 1.662000  |
| C                               | -1.184000 | 2.220000  | 0.740000  | H | -0.663000 | 1.533000  | 2.727000  |
| C                               | 2.644000  | 0.189000  | -1.597000 | H | -1.335000 | -2.444000 | -2.489000 |
| H                               | 2.268000  | 0.383000  | -2.598000 | H | -2.540000 | -4.551000 | -1.925000 |
| C                               | 1.067000  | -0.635000 | 1.647000  | C | 5.932000  | -0.041000 | 0.294000  |
| H                               | 0.917000  | -1.722000 | 1.646000  | H | 6.454000  | -0.811000 | -0.287000 |
| H                               | 1.383000  | -0.358000 | 2.661000  | H | 6.384000  | 0.921000  | 0.022000  |
| N                               | 1.719000  | -0.053000 | -0.636000 | H | 6.121000  | -0.224000 | 1.354000  |
| C                               | -2.566000 | 4.110000  | 0.181000  |   |           |           |           |
